# Supplementary material for: Better Medications Adherence Lowers Cardiovascular Events, Stroke, and All-Cause Mortality Risk: A Dose-Response Meta-Analysis
Source: MDPI journal article supplement (doi:10.3390/jcdd8110146), 2021-11-02
Supplement: s1 [file s1]

## Supplementary Material

**Table S1** Characteristics of the studies included in the meta-analysis

| Author            | Study period | Country       | Baseline population                     | Design | Medications                | Prevalence of good adherence % | Duration of follow-up | Gender | Age (mean age) | Men % | Sample size | Case  | Strategies for the assessment of adherence | outcomes                         |
|-------------------|--------------|---------------|-----------------------------------------|--------|----------------------------|--------------------------------|-----------------------|--------|----------------|-------|-------------|-------|--------------------------------------------|----------------------------------|
| Korhonen 2015[1]  | 1995–2006    | Finland       | Diabetes patients                       | NCCS   | Statins                    | 49.3                           | 3.9                   | M/W    | 64.2           | 62.9  | 8502        | 1703  | PDC                                        | Stroke                           |
| Bansilal 2016[2]  | 2010-2013    | United States | MI and atherosclerotic disease patients | CS     | Statins and ACE inhibitors | 43                             | 0.5                   | M/W    | 56.54          | 76.3  | 16991       | 836   | PDC                                        | CVE; Stroke                      |
| Karlsson 2017[3]  | 2007-2013    | Sweden        | Type 2 diabetes patients                | CS     | Lipid-lowering medications | NR                             | 3.5                   | M/W    | 62             | 56.8  | 86568       | 14213 | MPR                                        | CVE; Stroke; All-cause mortality |
| Rodriguez 2019[4] | 2013-2014    | United States | ASCVD                                   | CS     | Statins                    | NR                             | 2.9                   | M/W    | 21-85          | 98.4  | 347104      | 85930 | MPR                                        | All-cause mortality              |
| Kim 2017[5]       | 2002-2012    | Korea         | AIS patients                            | CS     | Statins                    | 21.4                           | 4.69                  | M/W    | 65-69          | 52.8  | 8001        | 2284  | PDC                                        | CVE                              |
| Corrao 2017[6]    | 2008-2012    | Italy         | Statins users                           | NCCS   | Statins                    | NR                             | NR                    | M/W    | ≥60            | 51    | 273769      | 14633 | PDC                                        | CVE                              |
| Mathews 2018[7]   | 2007-2010    | American      | MI patients                             | CS     | Multiple                   | NR                             | 2                     | M/W    | NR             | 48.5  | 19704       | 2757  | PDC                                        | CVE                              |
| Yeo 2020[8]       | 2010-2014    | Singapore     | IS patients                             | CS     | Antithrombotic or statin   | 28.6                           | 5                     | M/W    | ≥18            | 61    | 2299        | 178   | PDC                                        | Stroke; All-cause mortality      |

|                        |               |               |                                                         |      |                       |      |       |     |       |       |        |       |             |                                  |
|------------------------|---------------|---------------|---------------------------------------------------------|------|-----------------------|------|-------|-----|-------|-------|--------|-------|-------------|----------------------------------|
| Rannanheimo<br>2015[9] | 2001-<br>2004 | Finland       | New statin user                                         | CS   | Statins               | 53   | 4     | M/W | 59.2  | 43.9  | 97575  | 12611 | PDC         | CVE; Stroke; All-cause mortality |
| Hickson<br>2019[10]    | 2008-<br>2010 | United States | MI patients                                             | CS   | Statins               | 50.4 | 0.95  | M/W | ≥65   | 45.7  | 101011 | 13274 | PDC         | All-cause mortality              |
| Chen<br>2019[11]       | 2001-<br>2005 | China         | AIS patients                                            | CS   | Antithrombotic Agents | 26   | 2     | M/W | 67.8  | 56    | 7431   | 2238  | PDC         | CVE; Stroke; All-cause mortality |
| Ye 2013[12]            | 2005-<br>2011 | United States | Hyperlipidemia and/or type 2 diabetes mellitus patients | CS   | Colesevelam HCl       | 18.7 | 1.6   | M/W | 58.1  | 44.9  | 42549  | 471   | PDC         | CVE                              |
| Molnar<br>2016[13]     | 2007-<br>2011 | United States | CKD patients                                            | CS   | Multiple              | NR   | 1.9   | M/W | 72    | 96    | 32348  | 18606 | PDC and MPR | All-cause mortality              |
| Chen<br>2016[14]       | 2002-<br>2005 | China         | IS or TIA patients                                      | CS   | Statins               | 14.8 | 4.2   | M/W | 65    | 51.2  | 15408  | 5345  | MPR         | CVE                              |
| Phan<br>2019[15]       | 2006-<br>2016 | United States | MI patients                                             | CS   | Statins               | 81.4 | 4.3   | M/W | 85.4  | 2815  | 5629   | 3872  | PDC         | All-cause mortality              |
| Shalev<br>2012[16]     | 1998-<br>2009 | Israel        | New statin user                                         | CS   | Statins               | 28   | 5.79  | M/W | 57.82 | 42.32 | 171535 | 10159 | PDC         | CVE                              |
| Pittman<br>2011[17]    | 2008-<br>2009 | United States | All individuals with statin claim                       | CS   | Statins               | 82.7 | 1.5   | M/W | 53    | 58.6  | 381422 | 25570 | MPR         | CVE                              |
| Shalev<br>2009[18]     | 1998-<br>2006 | Israel        | new statins users with statin claim                     | CS   | Statins               | NR   | 5     | M/W | 57.6  | 49.2  | 229918 | 13165 | PDC         | All-cause mortality              |
| Perreault<br>2009[19]  | 1999-<br>2004 | Canada        | New statin users without prior CVD                      | NCCS | Statins               | NR   | 1-6.5 | M/W | 63    | 38.6  | 115290 | 9294  | MPR         | CVE                              |
| Corrao<br>2010[20]     | 2002-<br>2003 | Italy         | Healthy                                                 | CS   | Statins               | 20.2 | 4.3   | M/W | 62    | 40.2  | 84262  | 1397  | PDC         | CVE                              |

|                              |               |               |                                |      |          |      |         |     |      |      |        |       |     |                                  |
|------------------------------|---------------|---------------|--------------------------------|------|----------|------|---------|-----|------|------|--------|-------|-----|----------------------------------|
| Rasmussen<br>2007[21]        | 1999-<br>2003 | Canada        | AMI patients.                  | CS   | Multiple | 75   | 2.4     | M/W | 75.5 | 55.8 | 51310  | 10592 | PDC | All-cause mortality              |
| Wei<br>2004[22]              | 1994-<br>1999 | Scotland      | CVD patients                   | CS   | Multiple | 31   | 3.7     | M/W | 66.3 | 54.2 | 865    | 395   | MPR | CVE; All-cause mortality         |
| Wei<br>2002[23]              | 1985-<br>1995 | Scotland      | MI patients                    | CS   | Statins  | 63.7 | 2.4     | M/W | 69.7 | 57.5 | 5590   | 2016  | MPR | CVE; All-cause mortality         |
| Esposti<br>2012[24]          | 2004-<br>2006 | Italy         | New statins user               | CS   | Statins  | 41.1 | 0.5-3.5 | M/W | 66.5 | 51.1 | 19232  | 1579  | PDC | CVE; Stroke; All-cause mortality |
| Perreault<br>2009[25]        | 1999-<br>2004 | Canada        | New statins user               | NCCS | Statins  | 55   | 2.95    | M/W | 63   | 41   | 112092 | 2593  | MPR | All-cause mortality              |
| Mazzaglia<br>2009[26]        | 2000-<br>2005 | Italy         | Hypertensive patients          | CS   | AHM      | 8.1  | 4.6     | M/W | 62   | 41.6 | 18806  | 659   | PDC | CVE                              |
| Herttua<br>2013[27]          | 1995-<br>2007 | Finland       | Hypertensive patients          | CS   | AHM      | NR   | 10      | M/W | ≥30  | 43.5 | 73527  | 26704 | PDC | Stroke                           |
| Corrao<br>2011[28]           | 2000-<br>2007 | Italy         | Antihypertensive drug user     | CS   | AHM      | 24.3 | 6       | M/W | 58.5 | 43.9 | 242594 | 12016 | PDC | CVE                              |
| Krousel-<br>Wood<br>2015[29] | 2006-<br>2011 | United States | Hypertensive patients          | CS   | AHM      | 71.8 | 3.8     | M/W | 75   | 40.2 | 2075   | 240   | MPR | CVE                              |
| Wong<br>2013[30]             | 2001-<br>2012 | China         | New antihypertensive drug user | CS   | AHM      | 55   | 5       | M/W | ALL  | 45.1 | 218047 | 3825  | PDC | All-cause mortality              |
| Kim<br>2016[31]              | 2002-<br>2010 | South Korea   | New Hypertensive patients      | CS   | AHM      | 31.3 | 8       | M/W | ≥20  | 46.6 | 33728  | 5225  | CMA | CVE; Stroke; All-cause mortality |
| Herttua<br>2016[32]          | 1995-<br>2007 | Finland       | Hypercholesterolemia patients  | CS   | AHM      | NR   | 5.5     | M/W | ≥30  | 46   | 58266  | 532   | PDC | Stroke                           |

|                       |               |                  |                                   |      |                    |       |       |      |     |      |       |        |       |     |                                     |
|-----------------------|---------------|------------------|-----------------------------------|------|--------------------|-------|-------|------|-----|------|-------|--------|-------|-----|-------------------------------------|
| Esposti<br>2011[33]   | 2004-<br>2006 | Italy            | New antihypertensive<br>drug user | CS   | AHM                |       | 41.5  | 1.9  | M/W | 60.2 | 48    | 31306  | 1263  | PDC | CVE; Stroke; All-cause<br>mortality |
| Yang<br>2016[34]      | 2007-<br>2012 | United<br>States | Hypertensive patients             | CS   | AHM                |       | 46    | 6    | M/W | 50.3 | 32.7  | 59037  | 10041 | MPR | CVE; Stroke                         |
| Liu 2009[35]          | 1999-<br>2004 | China            | New Hypertensive<br>patients      | CS   | AHM                |       | NR    | 3.2  | M/W | 55.3 | 51.8  | 29759  | 1078  | PMC | Stroke                              |
| Corrao<br>2015[36]    | 2005-<br>2012 | Italy            | HF or hypertensive<br>HF patients | NCCS | AHM                |       | NR    | 6.6  | M/W | 67   | 54    | 76017  | 622   | PDC | CVE                                 |
| Yang<br>2017[37]      | 2008-<br>2014 | United<br>States | Hypertensive patients             | CS   | AHM                |       | 60.8  | 5.8  | M/W | 69.9 | 36.3  | 155597 | 47198 | PDC | CVE; Stroke                         |
| Kim<br>2016[38]       | 2007-<br>2011 | Korea            | New Hypertensive<br>patients      | CS   | AHM                |       | 57.7  | 3    | M/W | 58.8 | 47.5  | 564782 | 4655  | MPR | CVE                                 |
| Corrao<br>2017[39]    | 2007-<br>2012 | Italy            | New antihypertensive<br>drug user | NCCS | AHM                |       | 43.8  | 4    | M/W | 88   | 39.9  | 38461  | 14343 | PDC | CVE; Stroke; All-cause<br>mortality |
| Dongen<br>2019[40]    | 1994-<br>2007 | Finland          | IS                                | CS   | AHM                |       | 40    | 8.3  | M/W | 44   | 62.6  | 936    | 470   | PDC | CVE; Stroke; All-cause<br>mortality |
| Lee 2017[41]          | 2009-<br>2013 | Korea            | Hypertensive patients             | CS   | AHM                |       | 68.8  | NR   | M/W | 56.7 | 54.2  | 38520  | 957   | MPR | Stroke                              |
| Kim<br>2018[42]       | 2002-<br>2013 | South<br>Korea   | Hypertensive patients<br>with AHS | CS   | AHM                |       | 49.5  | 4.45 | M/W | 62   | 47.8  | 1872   | 634   | PDC | Stroke                              |
| Lavie<br>2021[43]     | 2009-<br>2014 | Israel           | New statins user                  | CS   | Statin             |       | 5.7   | 5    | M/W | 57.2 | 42.6  | 42767  | 4964  | PDC | CVE; All-cause<br>mortality         |
| Lee 2020[44]          | 2003-<br>2013 | South<br>Korea   | dyslipidemia                      | CS   | Statin             |       | 41.87 | 11   | M/W | NR   | 43.03 | 107954 | 1143  | PDC | All-cause mortality                 |
| Greenland<br>2020[45] | 2003-<br>2008 | Australian       | MI patients                       | CS   | Statin;<br>blocker | Beta- | NR    | 1    | M/W | 77.2 | 57.5  | 5938   | 1575  | PDC | CVE; All-cause<br>mortality         |

|                    |               |        |             |    |                |      |     |     |      |      |       |     |     |     |
|--------------------|---------------|--------|-------------|----|----------------|------|-----|-----|------|------|-------|-----|-----|-----|
| Ahrens<br>2021[46] | 2010-<br>2015 | German | MI patients | CS | Lipid-Lowering | 66.8 | 2.9 | M/W | 66.7 | 68.7 | 14944 | 668 | PDC | CVE |
|--------------------|---------------|--------|-------------|----|----------------|------|-----|-----|------|------|-------|-----|-----|-----|

---

AHM: antihypertensive medications; MPR, medication possession ratio (no. of days of medication supplied within refill interval/no. of days in refill interval); PDC, proportion of days covered (no. of days with medication on-hand/no. of days in specified time interval); PMC: proportion of months covered by prescribed; CMA: cumulative medication adherence; CVD: cardiovascular disease; CS: cohort study; NCCS: nested case-control study; CAD: coronary artery disease; CHD: coronary heart disease; AMI: acute myocardial infarction; HF: heart failure; IS: Ischemic stroke; TIA: transient ischemic attack; AIS: acute ischemic stroke; AHS: acute hemorrhagic stroke; MI: myocardial infarction; ASCVD: atherosclerotic cardiovascular disease; CKD: chronic kidney disease; ACS: acute coronary syndrome; CVE: cardiovascular events; NR, not reported

**Table S2** The data source in each included study

| Author            | Data source                                                                                                                                                                                                                                                            |
|-------------------|------------------------------------------------------------------------------------------------------------------------------------------------------------------------------------------------------------------------------------------------------------------------|
| Korhonen 2015     | Finnish health registers                                                                                                                                                                                                                                               |
| Bansilal 2016     | Medical and pharmaceutical claims obtained from Aetna Commercial and Medicare Advantage population databases                                                                                                                                                           |
| Karlsson 2017     | Swedish Prescribed Drug Register Swedish Prescribed Drug Register, National Diabetes Register, National Patient Register, Cause of Death Register, Longitudinal Integration Database for Health Insurance and Labour Market Studies                                    |
| Rodriguez 2019    | Veterans Affairs Health System                                                                                                                                                                                                                                         |
| Kim 2017          | National Health Insurance Service-National Sample Cohort.                                                                                                                                                                                                              |
| Corrao 2017       | Healthcare utilization databases of Lombardy, Acute Coronary Treatment and Intervention Outcomes Network Registry-Get With The Guidelines                                                                                                                              |
| Mathews 2018      | National Healthcare Group and Singapore Stroke Registry, Prescription, special reimbursement, and hospital discharge registers and registers of Statistics Finland.                                                                                                    |
| Yeo 2020          | US Medicare 2007 2011 data and prescription Part D claims from the CMS Chronic Conditions Data Warehouse                                                                                                                                                               |
| Rannanheimo 2015  | Taiwan's National Health Insurance claims dataset                                                                                                                                                                                                                      |
| Hickson 2019      | MarketScan commercial and Medicare databases                                                                                                                                                                                                                           |
| Chen 2019         | US Renal Data System                                                                                                                                                                                                                                                   |
| Ye 2013           | Taiwan Bureau of National Health Insurance database                                                                                                                                                                                                                    |
| Molnar 2016       | An integrated healthcare system in Southern California.                                                                                                                                                                                                                |
| Chen 2016         | Maccabi Healthcare Services                                                                                                                                                                                                                                            |
| Phan 2019         | Medco National Integrated database                                                                                                                                                                                                                                     |
| Shalev 2012       | Maccabi Healthcare Services                                                                                                                                                                                                                                            |
| Pittman 2011      | He Régie de l'assurance maladie du Québec databases.                                                                                                                                                                                                                   |
| Shalev 2009       | Health service databases of Lombardia                                                                                                                                                                                                                                  |
| Perreault 2009    | Ontario Myocardial Infarction Database                                                                                                                                                                                                                                 |
| Corrao 2010       | MEMO record-linkage database                                                                                                                                                                                                                                           |
| Rasmussen 2007    | Medicine Monitoring Unit's record linkage database                                                                                                                                                                                                                     |
| Wei 2004          | Health-Assisted Subjects Database, Medications Prescription Database, Hospital Discharge Database, Mortality Database                                                                                                                                                  |
| Wei 2002          | Régie d'assurance maladie du Québec and Med-Echo databases.                                                                                                                                                                                                            |
| Esposti 2012      | Health Search/Thales Database in Italy                                                                                                                                                                                                                                 |
| Perreault 2009    | Statistics Finland Labour Market data; National Drug Reimbursement Register and the Drug Prescription Register kept by the Social Insurance Institution of Finland                                                                                                     |
| Mazzaglia 2009    | Health service databases of Lombardy in Italy                                                                                                                                                                                                                          |
| Herttua 2013      | The Cohort Study of Medication Adherence in Older Adults in the southeastern Louisiana, USA                                                                                                                                                                            |
| Corrao 2011       | Territory-wide database in Hong Kong                                                                                                                                                                                                                                   |
| Krousel-Wood 2015 | Korean National Health Insurance                                                                                                                                                                                                                                       |
| Wong 2013         | The Statistics Finland Labor Market database; National Death Register in Finland; National Drug Reimbursement Register in Finland; the Drug Prescription Register by the Social Insurance Institution of Finland; National Institute for Health and Welfare in Finland |
| Kim 2016          | Medications Prescription Database maintained by the Local Health Unit of Florence, Italy                                                                                                                                                                               |
| Herttua 2016      | MarketScan Medicaid data                                                                                                                                                                                                                                               |
| Esposti 2011      | Taiwan's National Health Insurance reimbursement database                                                                                                                                                                                                              |
| Yang 2016         | healthcare utilization databases of Lombardy                                                                                                                                                                                                                           |
| Liu 2009          |                                                                                                                                                                                                                                                                        |
| Corrao 2015       |                                                                                                                                                                                                                                                                        |

|                             |                                                                                                                                    |
|-----------------------------|------------------------------------------------------------------------------------------------------------------------------------|
| Yang 2017                   | Medicare fee-for-service beneficiaries aged 66 to 79 years enrolled during 2007–2008                                               |
| Kim 2016                    | National Health Insurance Service                                                                                                  |
| Corrao 2017                 | healthcare utilization databases of Lombardy                                                                                       |
| Dongen 2019                 | Care Register for Health Care, the National Institute for Health and Welfare                                                       |
| Lee 2017                    | National Health Insurance claim data and check-up data                                                                             |
| Kim 2018                    | The homepage of National Health Insurance Sharing Service                                                                          |
| Lavie 2021                  | The Clalit comprehensive health care data warehouse                                                                                |
| Lee 2020                    | National Health Insurance Service National Sample Cohort                                                                           |
| Greenland 2020              | The Western Australian Data Linkage System - the Hospital Morbidity Data Collection for hospital admissions and Mortality register |
| Ahrens 2021                 | German health claims database                                                                                                      |
| <hr/>                       |                                                                                                                                    |
| CKD, chronic kidney disease |                                                                                                                                    |

**Table S3** The confounders adjusted for the multivariate analysis in each included study

| Author           | Covariates                                                                                                                                                                                                                                                                                                                                                                                                                                                                                                                                                                                                                                                                                                                                                                                                                                                                                         |
|------------------|----------------------------------------------------------------------------------------------------------------------------------------------------------------------------------------------------------------------------------------------------------------------------------------------------------------------------------------------------------------------------------------------------------------------------------------------------------------------------------------------------------------------------------------------------------------------------------------------------------------------------------------------------------------------------------------------------------------------------------------------------------------------------------------------------------------------------------------------------------------------------------------------------|
| Korhonen 2015    | Duration of diabetes, type of antidiabetic medication; use of warfarin, platelet inhibitors, digitalis glycosides, nitrates or antihypertensive medication; history of IS, CAD, peripheral arterial disease, congestive heart failure, arrhythmias, moderate/severe hypertension, microangiopathic complications or depression; socioeconomic status, hospital district; type and intensity of the initial statin; and dispensation delay                                                                                                                                                                                                                                                                                                                                                                                                                                                          |
| Bansilal 2016    | Demographic characteristics, comorbid conditions, concomitant medication use and copayment, and preventive service use                                                                                                                                                                                                                                                                                                                                                                                                                                                                                                                                                                                                                                                                                                                                                                             |
| Karlsson 2017    | Sex, age, country of birth, marital status, education level, employment status, profession and individual income, morbidities and diabetes duration, glycated haemoglobin, estimated glomerular filtration rate, BMI, blood lipid levels, blood pressure, microalbuminuria, macroalbuminuria, physical activity and smoking                                                                                                                                                                                                                                                                                                                                                                                                                                                                                                                                                                        |
| Rodriguez 2019   | Adherence to other cardiac medications, age, statin intensity, sex, race/ethnicity, atherosclerotic cardiovascular disease diagnosis, clinical comorbidities, Council of Teaching Hospitals and Health Systems, and baseline creatinine, vital signs, pulse oximetry, and weight.                                                                                                                                                                                                                                                                                                                                                                                                                                                                                                                                                                                                                  |
| Kim 2017         | Sex, age, diabetes mellitus, atrial fibrillation, prior myocardial infarction, use of thrombolysis, household income, hospital type, index-stroke year, and adherence to the above medications                                                                                                                                                                                                                                                                                                                                                                                                                                                                                                                                                                                                                                                                                                     |
| Corrao 2017      | Index prescription, gender, age and potency of the dispensed statins, hospital admissions for CV events, and the Charlson comorbidity index score, the use of other medicaments                                                                                                                                                                                                                                                                                                                                                                                                                                                                                                                                                                                                                                                                                                                    |
| Mathews 2018     | Age, gender, race, length of stay, and BMI, indicators of socioeconomic status, additional insurance besides Medicare , comorbidities, STEMI or STEMI equivalent on arrival, transfer-in status, cardiac catheterization within 24 hours of arrival, in-hospital PCI, left ventricular ejection fraction, end-stage renal disease, baseline hemoglobin, in-hospital HF complication, in-hospital major bleeding, and any blood transfusion, hospital geographic region, hospital type, teaching hospital, and hospital bed size.                                                                                                                                                                                                                                                                                                                                                                   |
| Yeo 2020         | Age, statin prescription at discharge and average time between encounters                                                                                                                                                                                                                                                                                                                                                                                                                                                                                                                                                                                                                                                                                                                                                                                                                          |
| Rannanheimo 2015 | Sex, Age, hospital district, taxable income, level of education, socioeconomic group, marital status, family type, type of main activity, dysfunction of lipid metabolism, diabetes, hypertension, type of initial statin, intensity of initial statin therapy, dispensation delay, year of statin initiation, antithrombotic agents, diuretics, beta-blocking agents, calcium channel blockers, agents acting on the renin-angiotensin system, number of concurrent CV medications, Parkinson disease, rheumatoid arthritis, certain diseases of the nervous system, depression, antidepressants, respiratory diseases, renal impairments, obesity, diabetic retinopathy, polyneuropathy, sleep apnea, psoriasis, alcoholism/narcomania, nonsteroidal anti-inflammatory drugs, corticosteroids for systemic use, number of concurrent medications, medication costs, and number of hospitals days |
| Hickson 2019     | Sociodemographics, baseline clinical conditions and medication use, whether the patient was a new user of statins, index hospitalization events, postdischarge clinical events and medication use, and changes in statin doses.                                                                                                                                                                                                                                                                                                                                                                                                                                                                                                                                                                                                                                                                    |
| Chen 2019        | Age, gender, onset year, pre-morbid risk factors, stroke subtype, CCI; and brain imaging, respiratory disease/infections, neurosurgery, rehabilitation use, admission department, hospital level, geographic region, and use of NSAID                                                                                                                                                                                                                                                                                                                                                                                                                                                                                                                                                                                                                                                              |
| Ye 2013          | Age, sex, region, comorbidities, and concomitant drugs                                                                                                                                                                                                                                                                                                                                                                                                                                                                                                                                                                                                                                                                                                                                                                                                                                             |
| Molnar 2016      | Age, sex, race/ethnicity, marital status and ZIP code, CCI and presence of diabetes, congestive heart failure, cardiovascular/cerebrovascular disease, presence of depression, presence of anxiety and type of vascular access                                                                                                                                                                                                                                                                                                                                                                                                                                                                                                                                                                                                                                                                     |
| Chen 2016        | Age, gender, Charlson index score, diabetes mellitus, anticoagulant agents, ACEI/ARB, calcium channel blockers, diuretics                                                                                                                                                                                                                                                                                                                                                                                                                                                                                                                                                                                                                                                                                                                                                                          |
| Phan 2019        | Demographics, comorbidities, and exposure to other cardiac medications                                                                                                                                                                                                                                                                                                                                                                                                                                                                                                                                                                                                                                                                                                                                                                                                                             |



|                   |                                                                                                                                                                                                                                                                                                                                                                                                                                        |
|-------------------|----------------------------------------------------------------------------------------------------------------------------------------------------------------------------------------------------------------------------------------------------------------------------------------------------------------------------------------------------------------------------------------------------------------------------------------|
| Shalev 2012       | Age, gender, residential socioeconomic level, diabetes mellitus, hypertension, use of health services, and median baseline lipids levels.                                                                                                                                                                                                                                                                                              |
| Pittman 2011      | Age, gender, coronary artery disease, diabetes, hypertension, stroke, peripheral arterial disease, congestive heart failure, depression, year 1 hospitalization, year 1 emergency department visits, and number of medications in year 1.                                                                                                                                                                                              |
| Shalev 2009       | Age and sex, marital status, nationality, socioeconomic status, years of living in Israel, residence area, chronic condition, visits to primary care physician during the year before the index date, number of hospitalizations during the year before the index date, cancer, diabetes mellitus, and use of antihypertensives and diuretics. mean level of low-density lipoprotein cholesterol during the year before the index date |
| Perreault 2009    | Age, sex, other cardiovascular drugs and previous events                                                                                                                                                                                                                                                                                                                                                                               |
| Corrao 2010       | Gender, age at entry, statin type for first-line therapy and concomitant use of other drugs                                                                                                                                                                                                                                                                                                                                            |
| Rasmussen 2007    | Age, sex, income, specialty of attending physician, drug therapy, comorbidity at index AMI, readmissions within 1 y after discharge, Observation time, Deaths in observation period                                                                                                                                                                                                                                                    |
| Wei 2004          | Age, sex, social deprivation, prior OAD, cardiovascular disease, diabetes mellitus, PVD, prior beta-blocker use, prior use of calcium blockers, angiotensin-converting enzyme inhibitors, alphablockers, antihypertensive drugs, thiazide diuretic, loop diuretic, nitrates, antiplatelet drugs, lipid-lowering and steroid prescriptions                                                                                              |
| Wei 2002          | Age, sex, socioeconomic deprivation, serum cholesterol concentration, diabetes mellitus, cardiovascular drug use, and other hospitalisations.                                                                                                                                                                                                                                                                                          |
| Esposti 2012      | Age, sex, medications before the enrollment date, cardiovascular risk at baseline, and statin adherence level                                                                                                                                                                                                                                                                                                                          |
| Perreault 2009    | Sex and social assistance, occurrence of coronary artery disease, chronic heart failure, peripheral artery disease, or other cardiovascular disease conditions, diabetes and hypertension, the use of antidiabetic or antihypertensive agents , chronic disease score.                                                                                                                                                                 |
| Mazzaglia 2009    | Age, sex, use of antithrombotics, concurrent medications, and comorbidities, prior hospitalization, and the number of AHM                                                                                                                                                                                                                                                                                                              |
| Herttua 2013      | Age, sex, length of AHM, education, income, comorbidity, and a history of cancer                                                                                                                                                                                                                                                                                                                                                       |
| Corrao 2011       | Sex, age, the number of AHM, comorbidity, and drugs prescribed for heart failure or coronary heart disease                                                                                                                                                                                                                                                                                                                             |
| Krousel-Wood 2015 | Age, sex, race, marital status, education, comorbidities, the number of AHM, BMI, and lifestyle behaviors                                                                                                                                                                                                                                                                                                                              |
| Wong 2013         | Age, sex, public service, and the class of first AHM                                                                                                                                                                                                                                                                                                                                                                                   |
| Kim 2016          | Age, sex, income, residential regions, comorbidities, and the number of AHM                                                                                                                                                                                                                                                                                                                                                            |
| Herttua 2016      | Age, sex, education, comorbidity, and a history of cancer                                                                                                                                                                                                                                                                                                                                                                              |
| Esposti 2011      | Age, sex, comorbidities, and use of antidiabetic agents, lipid-lowering agents, cardiac therapy, and antiplatelet agents                                                                                                                                                                                                                                                                                                               |
| Yang 2016         | Age, sex, race, previous CVD, and comorbidities                                                                                                                                                                                                                                                                                                                                                                                        |
| Liu 2009          | Age, sex, the number of AHM, and comorbidities                                                                                                                                                                                                                                                                                                                                                                                         |
| Corrao 2015       | The antihypertensive drug class, use of statins and antidiabetic and antidepressant agents, and the CCI, the number of antihypertensive drug classes, the switching between antihypertensive drugs, the addition of other cardiovascular drugs to the antihypertensive treatment regimen, and the number of prescribing physicians                                                                                                     |
| Yang 2017         | Age, sex, race/ethnicity, urban-rural residence, statins use, number of antihypertensive medications, status of low-income subsidy, out-of-pocket medications payment/day, CCI, and Alzheimer's disease, asthma, chronic kidney disease, chronic obstructive pulmonary disease and bronchiectasis, depression, diabetes mellitus, hyperlipidemia, lung or colorectal cancer, and rheumatoid arthritis/osteoarthritis.                  |
| Kim 2016          | Gender, age, the type of health insurance coverage, the main types of medical institutions, the location of medical institutions, CCI, past history of                                                                                                                                                                                                                                                                                 |

|                                                                                                                                                                                                                                                                                                                                                                                                                                                                                                                                                                                                                                                                                                              |                                                                                                                                                                                                                                                                                                                                                                                                                                                            |
|--------------------------------------------------------------------------------------------------------------------------------------------------------------------------------------------------------------------------------------------------------------------------------------------------------------------------------------------------------------------------------------------------------------------------------------------------------------------------------------------------------------------------------------------------------------------------------------------------------------------------------------------------------------------------------------------------------------|------------------------------------------------------------------------------------------------------------------------------------------------------------------------------------------------------------------------------------------------------------------------------------------------------------------------------------------------------------------------------------------------------------------------------------------------------------|
|                                                                                                                                                                                                                                                                                                                                                                                                                                                                                                                                                                                                                                                                                                              | hospitalization and diabetes mellitus , the number of anti-hypertensive drugs, and the number of medical institutions for the 1st one year .                                                                                                                                                                                                                                                                                                               |
| Corrao 2017                                                                                                                                                                                                                                                                                                                                                                                                                                                                                                                                                                                                                                                                                                  | Antihypertensive treatment strategy; drug class; the use of antiarrhythmic, antiplatelet, oral anticoagulant, lipid-lowering, antidiabetic and antidepressant agents; the CCI                                                                                                                                                                                                                                                                              |
| Dongen 2019                                                                                                                                                                                                                                                                                                                                                                                                                                                                                                                                                                                                                                                                                                  | Age, sex, types 1 and 2 diabetes mellitus, cigarette smoking, heart failure, pre-existing hypertension, dyslipidemia, heavy drinking, contraceptive pill use, modified TOAST classification, NIHSS at admission and prior use of antihypertensive medication.                                                                                                                                                                                              |
| Lee 2017                                                                                                                                                                                                                                                                                                                                                                                                                                                                                                                                                                                                                                                                                                     | Age, sex, income, region, CCI, metabolic syndrome, family history of stroke, smoking, regular exercise, type of hypertension, duration of hypertension and year.                                                                                                                                                                                                                                                                                           |
| Kim 2018                                                                                                                                                                                                                                                                                                                                                                                                                                                                                                                                                                                                                                                                                                     | Type of hemorrhagic stroke , sex, age, diabetes mellitus, prior myocardial infarction, household income, length of hospital stay, and year of index hemorrhagic stroke                                                                                                                                                                                                                                                                                     |
| Lavie 2021                                                                                                                                                                                                                                                                                                                                                                                                                                                                                                                                                                                                                                                                                                   | Age, sex, socioeconomic status, immigration status, systolic and diastolic blood pressure, smoking status, BMI level, blood glucose concentration (mg/dl), total cholesterol, LDL cholesterol, HDL cholesterol, triglycerides, CCI and medication use: calcium channel blockers, use of beta-blockers, thiazides, oral steroids, oral contraceptives, antipsychotics, phenytoin, thyroxine, and fibrates.                                                  |
| Lee 2020                                                                                                                                                                                                                                                                                                                                                                                                                                                                                                                                                                                                                                                                                                     | NR                                                                                                                                                                                                                                                                                                                                                                                                                                                         |
| Greenland 2020                                                                                                                                                                                                                                                                                                                                                                                                                                                                                                                                                                                                                                                                                               | age, sex, accessibility/remoteness, history of: hypertension, heart failure, atrial fibrillation, diabetes, chronic obstructive pulmonary disease, chronic kidney disease, stroke, peripheral vascular disease, coronary heart disease, coronary artery revascularization procedure, coronary heart disease admissions with or without coronary artery revascularisation procedure in the one-year landmark period and concomitant cardioprotective drugs. |
| Ahrens 2021                                                                                                                                                                                                                                                                                                                                                                                                                                                                                                                                                                                                                                                                                                  | age, sex, history of chronic CVD conditions (any of the following: carotid stenosis, peripheral artery disease, abdominal aortic aneurysm, or other cardiac ischaemia), type 2 diabetes, chronic kidney disease stage 4–5, atrial fibrillation, anti-thrombotic medication use, hypertension, CCI and acute cardiovascular hospitalisation in the past year.                                                                                               |
| <hr/> AHM, antihypertensive medication; CVD, cardiovascular disease; CCI, Charlson comorbidity Index; BMI, body mass index; SBP, systolic blood pressure; DBP, diastolic blood pressure; HIV, human immunodeficiency virus; AIDS, acquired immune deficiency syndrome; CHF, congestive heart failure; PAD, peripheral artery diseases; CAD, coronary artery disease; TIA, transient ischemic attacks; HF, heart failure; CV, cardiovascular; BP, blood pressure; CKD, chronic kidney disease; ASCVD, atherosclerotic cardiovascular disease; CHD, coronary heart disease ;AMI, myocardial infarction; NSAID, nonsteroidal anti-inflammatory drug; PCI, percutaneous coronary intervention; NR, not reported. |                                                                                                                                                                                                                                                                                                                                                                                                                                                            |

**Table S4** Quality assessment of the included studies\*

[illegible]

|                   |   |   |   |   |   |   |   |   |   |
|-------------------|---|---|---|---|---|---|---|---|---|
| Perreault 2009    | 1 | 1 | 1 | 1 | 2 | 1 | 1 | 1 | 9 |
| Corrao 2015       | 1 | 1 | 0 | 1 | 2 | 1 | 1 | 0 | 7 |
| Yang 2017         | 1 | 1 | 1 | 1 | 1 | 1 | 1 | 1 | 8 |
| Lee 2017          | 1 | 1 | 1 | 1 | 2 | 1 | 1 | 1 | 9 |
| Kim 2018          | 1 | 1 | 1 | 1 | 2 | 1 | 1 | 1 | 9 |
| Krousel-Wood 2018 | 1 | 1 | 0 | 1 | 2 | 1 | 1 | 1 | 8 |
| Corrao 2017       | 0 | 1 | 1 | 1 | 2 | 1 | 1 | 1 | 8 |
| Kim 2016          | 1 | 1 | 1 | 1 | 2 | 1 | 1 | 1 | 9 |
| Dongen 2019       | 1 | 0 | 1 | 1 | 2 | 1 | 1 | 0 | 7 |
| Mazzaglia 2009    | 1 | 1 | 1 | 1 | 1 | 1 | 1 | 1 | 8 |
| Herttua 2013      | 1 | 1 | 1 | 1 | 2 | 1 | 1 | 1 | 9 |
| Corrao 2011       | 1 | 1 | 1 | 1 | 1 | 1 | 1 | 1 | 8 |
| Krousel-Wood 2015 | 1 | 1 | 1 | 1 | 2 | 1 | 1 | 1 | 9 |
| Wong 2013         | 1 | 1 | 1 | 1 | 0 | 1 | 1 | 1 | 7 |
| Esposti 2011      | 1 | 1 | 1 | 1 | 1 | 1 | 1 | 1 | 8 |
| Yang 2016         | 1 | 1 | 1 | 1 | 1 | 0 | 1 | 1 | 8 |
| Liu 2009          | 1 | 1 | 1 | 1 | 2 | 1 | 1 | 1 | 9 |
| Herttua 2016      | 1 | 1 | 1 | 1 | 2 | 1 | 1 | 1 | 9 |
| Lavie 2021        | 0 | 1 | 1 | 1 | 0 | 1 | 1 | 1 | 6 |
| Lee 2020          | 0 | 1 | 0 | 1 | 1 | 0 | 1 | 1 | 5 |
| Greenland 2020    | 0 | 1 | 1 | 1 | 0 | 1 | 1 | 1 | 6 |
| Ahrens 2021       | 1 | 1 | 1 | 1 | 0 | 0 | 1 | 1 | 6 |

\*Newcastle-Ottawa Scale was used to assess the study quality in this meta-analysis. The full score was 9 stars, and the high-quality study was defined as a study with 8 awarded stars.

† A maximum of two stars could

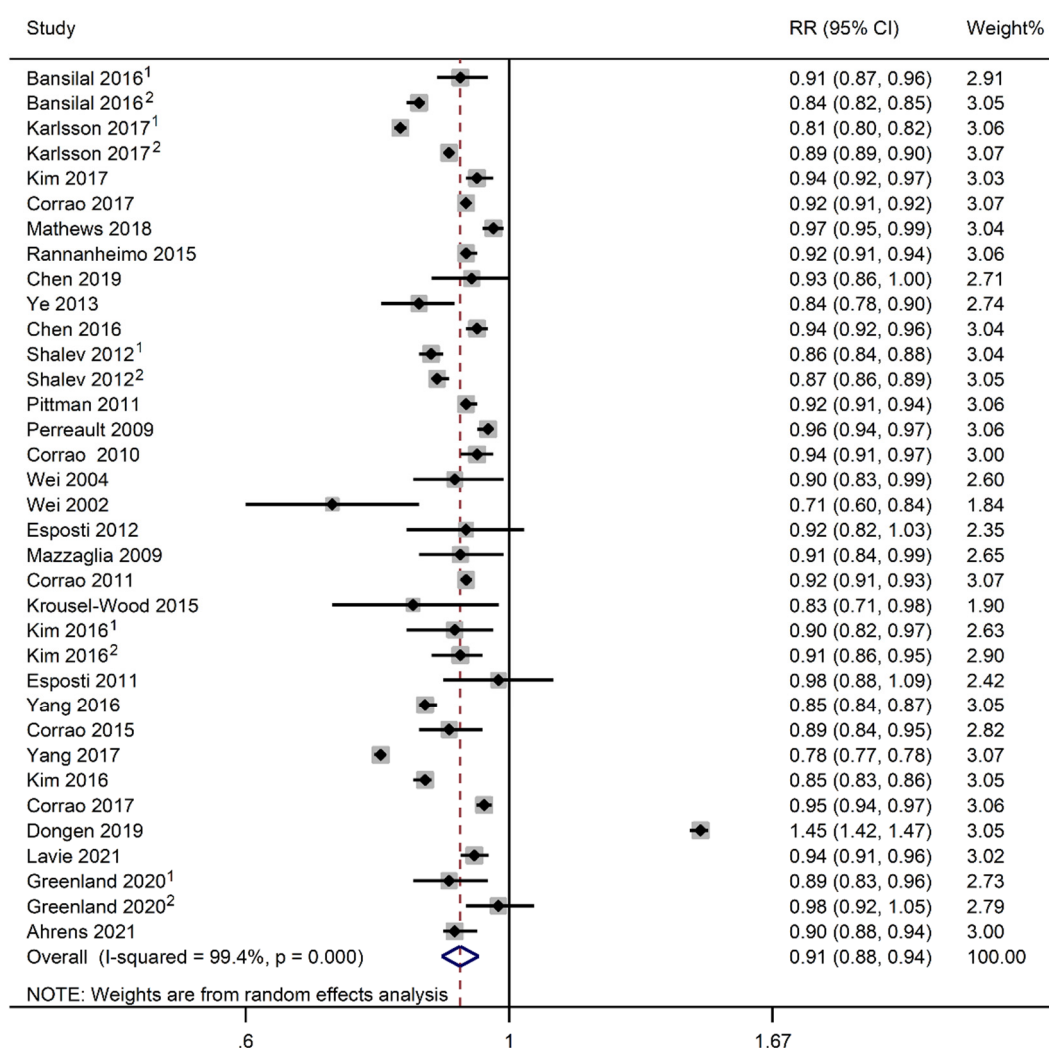

**Figure S1** Forest plot of study-specific relative risk statistics for total cardiovascular diseases per 20% increment of cardiovascular medications adherence  
 Bansilal 2016<sup>1</sup>: Post-MI cohorts, Bansilal 2016<sup>2</sup>: atherosclerosis cohorts, Karlsson 2017<sup>1</sup>: primary prevention, Karlsson 2017<sup>2</sup>: secondary prevention, Shalev 2012<sup>1</sup>: women, Shalev 2012<sup>2</sup>: men, Kim 2016<sup>1</sup>: acute myocardial infarction, Kim 2016<sup>2</sup>: ischemic heart disease.

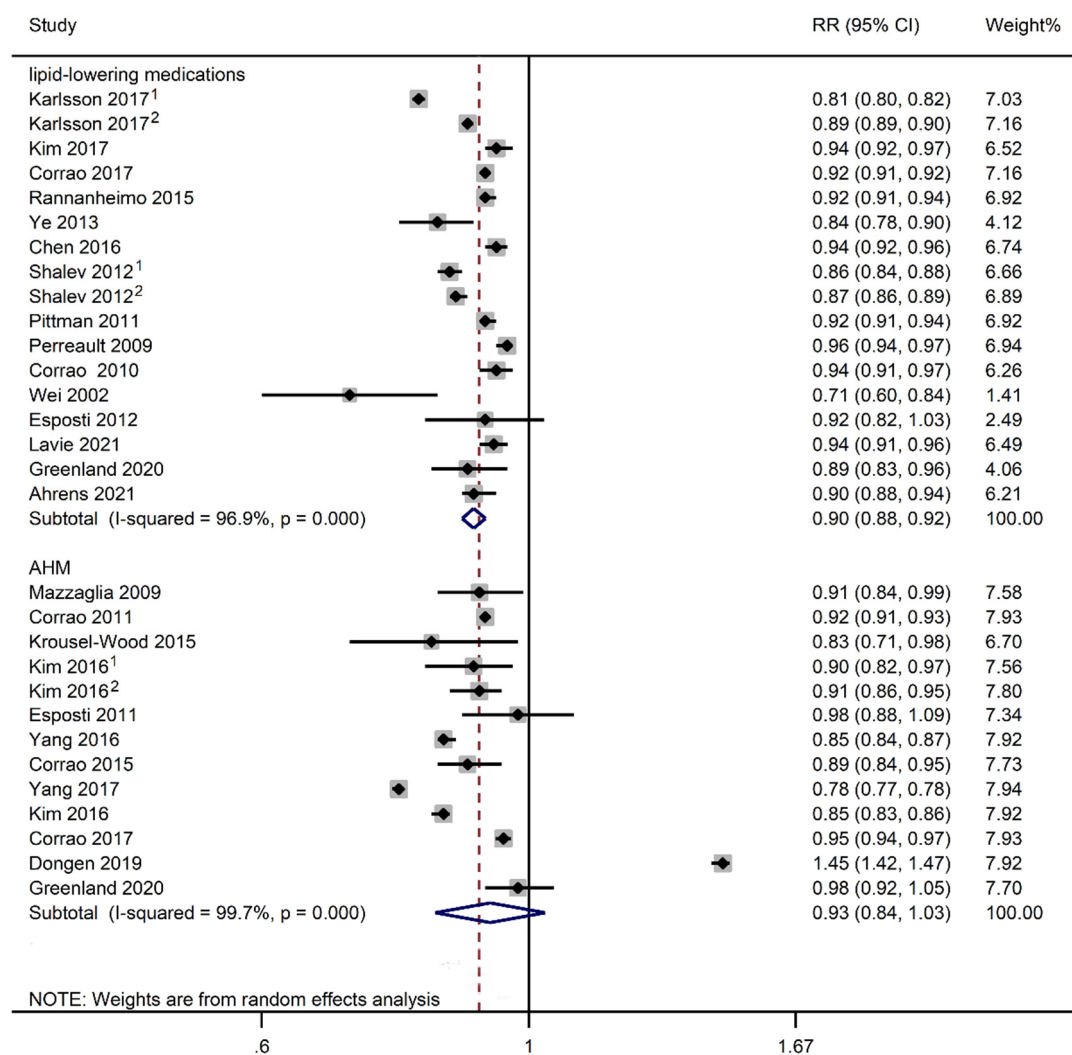

**Figure S2** Forest plot of study-specific relative risk statistics for total cardiovascular diseases per 20% increment of antihypertensive medication adherence (AHM) and lipid-lowering medications adherence. Kim 2016<sup>1</sup>: acute myocardial infarction, Kim 2016<sup>2</sup>: ischemic heart disease, Karlsson 2017<sup>1</sup>: primary prevention, Karlsson 2017<sup>2</sup>: secondary prevention, Shalev 2012<sup>1</sup>: women, Shalev 2012<sup>2</sup>: men

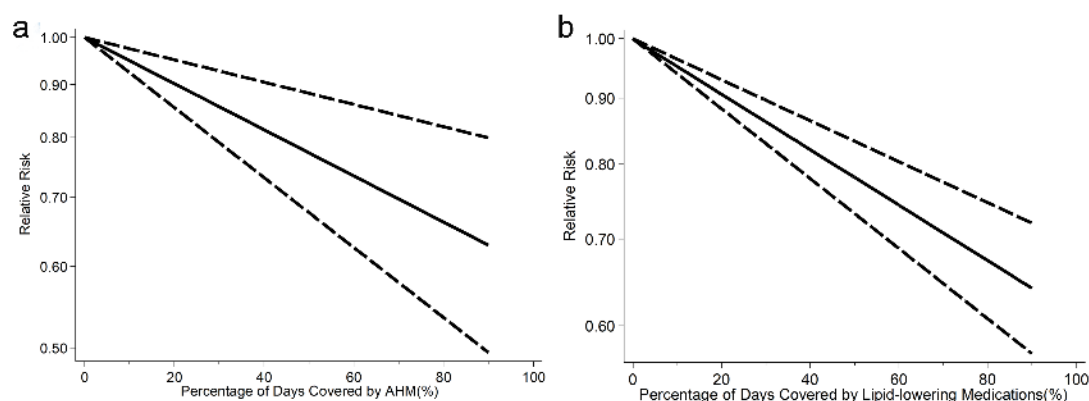

**Figure S3** (a) Pooled dose-response analysis of antihypertensive medication adherence and total Cardiovascular Diseases risk (solid line). (b) Pooled dose-response analysis of lipid-lowering medication adherence and total Cardiovascular Diseases risk (solid line). Dashed lines represent the 95% CI.

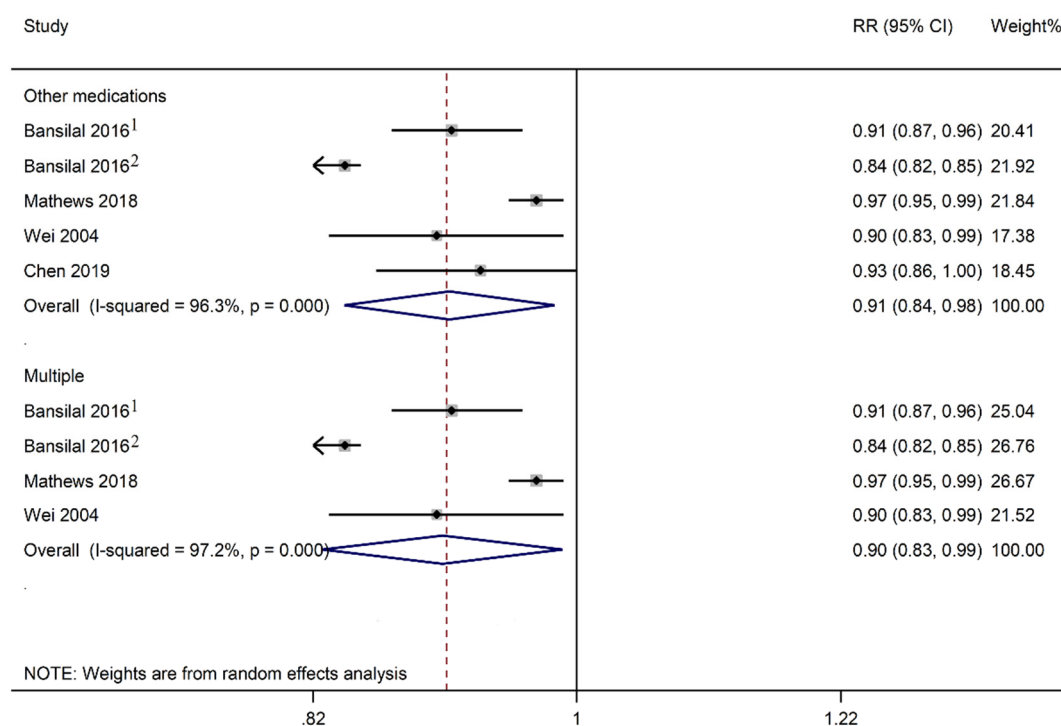

**Figure S4** Forest plot of study-specific relative risk statistics for total cardiovascular diseases per 20% increment of multiple medication and other medication (multiple and antithrombotic) adherence. Bansilal 2016<sup>1</sup>: Post-MI cohorts, Bansilal 2016<sup>2</sup>: atherosclerosis cohorts

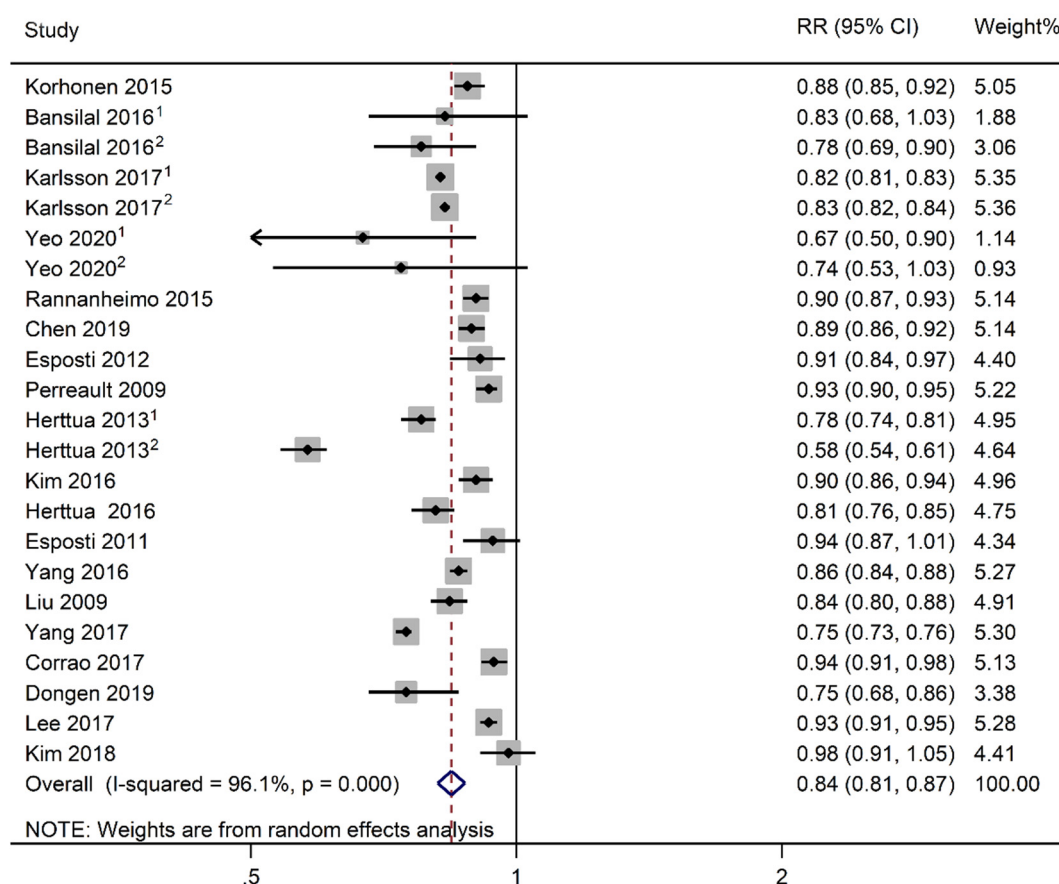

**Figure S5** Forest plot of study-specific relative risk statistics for stroke per 20% increment of medications adherence.

Bansilal 2016<sup>1</sup>: Post-MI cohorts, Bansilal 2016<sup>2</sup>: atherosclerosis cohorts, Karlsson 2017<sup>1</sup>: primary prevention, Karlsson 2017<sup>2</sup>: secondary prevention, Yeo 2020: antithrombotics, Yeo 2020: stains, Herttua 2013<sup>1</sup>: non-fatal stroke, Herttua 2013<sup>2</sup>: fatal stroke



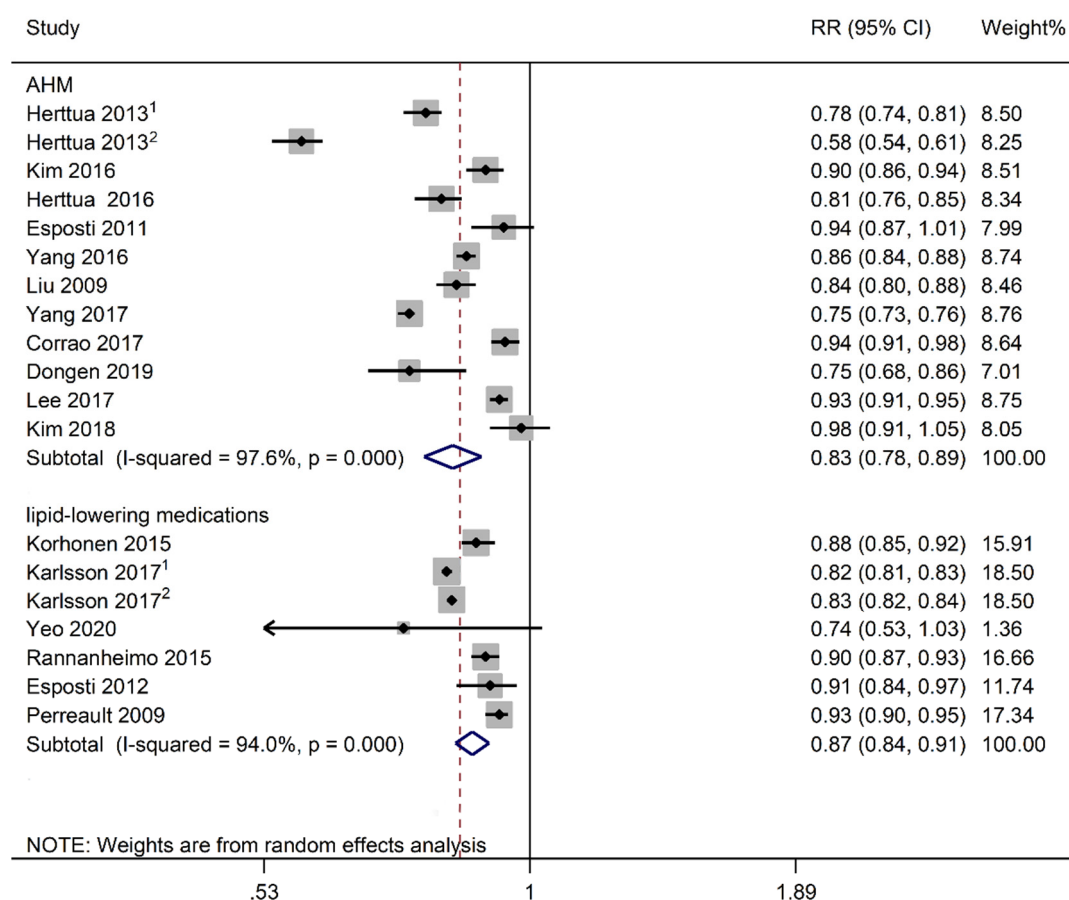

**Figure S6** Forest plot of study-specific relative risk statistics for stroke per 20% increment of antihypertensive medication adherence (AHM) and lipid-lowering medications adherence. Herttua 2013<sup>1</sup>: non-fatal stroke, Herttua 2013<sup>2</sup>: fatal stroke; Karlsson 2017<sup>1</sup>: primary prevention Karlsson 2017<sup>2</sup>: secondary prevention

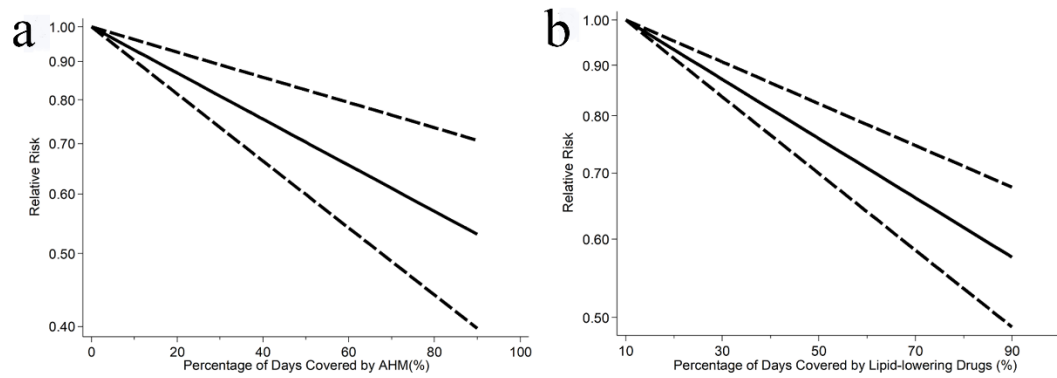

**Figure S7 (a)** Pooled dose-response analysis of antihypertensive medication adherence and stroke risk (solid line). **(b)** Pooled dose-response analysis of lipid-lowering medication adherence and stroke risk (solid line). Dashed lines represent the 95% CI.

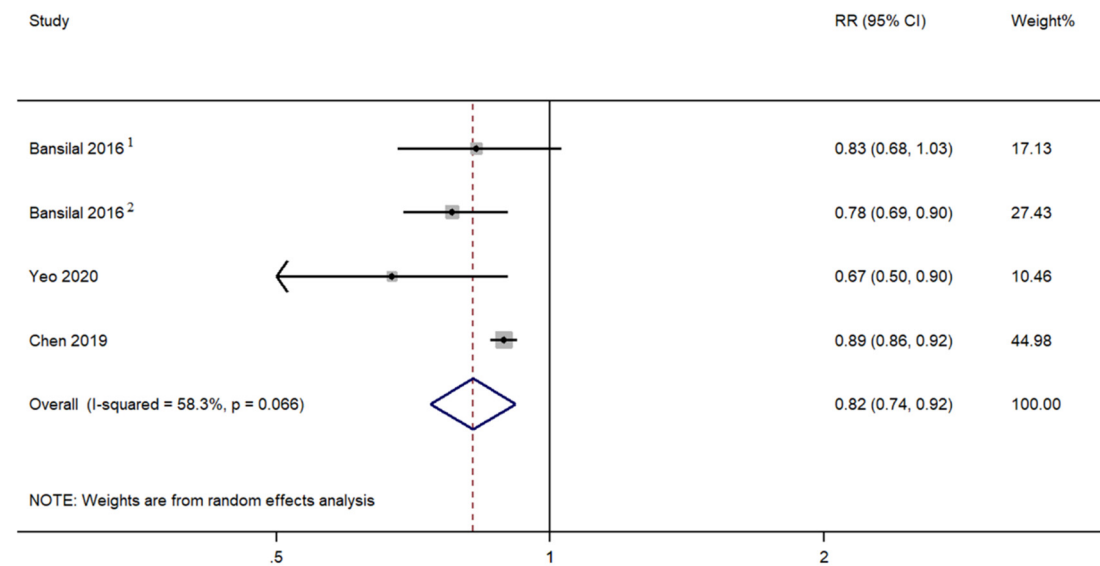

**Figure S8** Forest plot of study-specific relative risk statistics for stroke per 20% increment of other medication (multiple and antithrombotic) adherence.  
 Bansilal 2016<sup>1</sup>: Post-MI cohorts, Bansilal 2016<sup>2</sup>: atherosclerosis cohorts

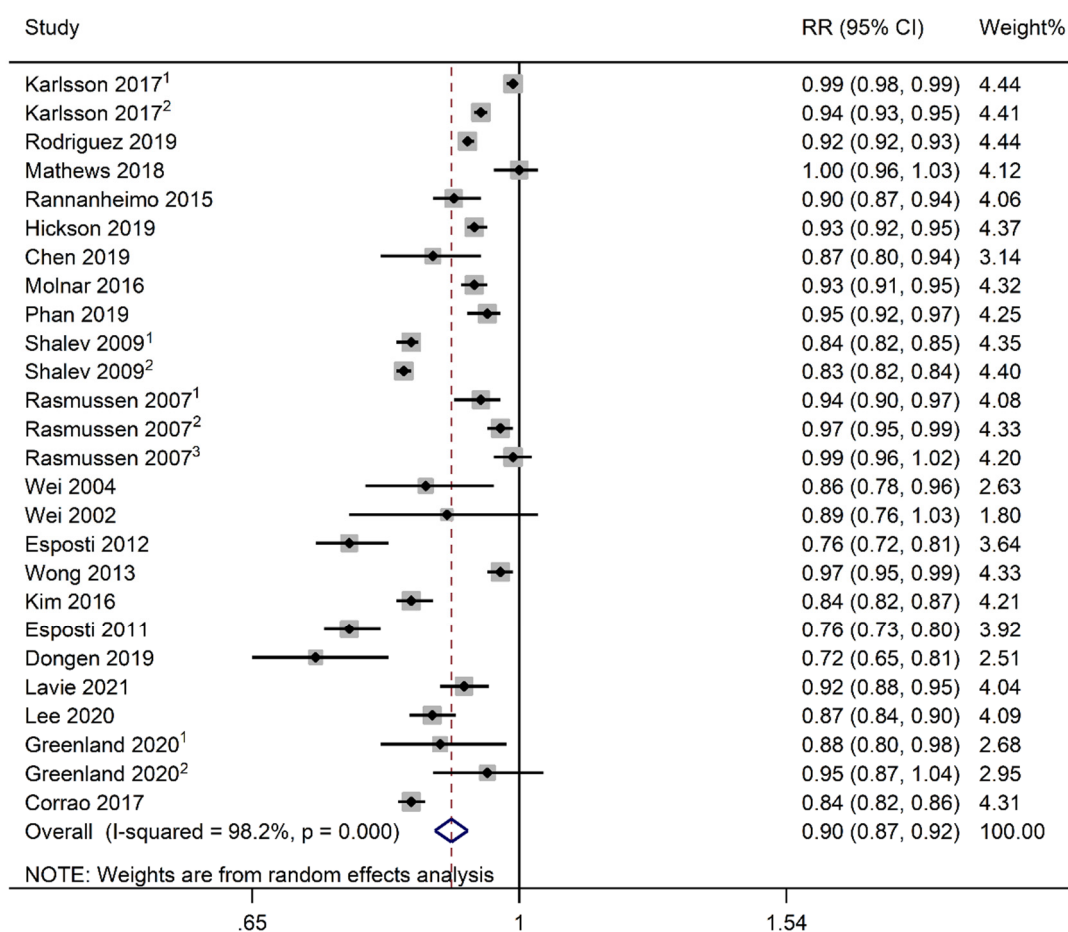

**Figure S9** Forest plot of study-specific relative risk statistics for all-cause mortality per 20% increment of medications adherence.

Karlsson 2017<sup>1</sup>: primary prevention Karlsson 2017<sup>2</sup>: secondary prevention, Shalev 2009<sup>1</sup>: primary prevention, Shalev 2009<sup>2</sup>: secondary prevention, Rasmussen 2007<sup>1</sup>: statins, Rasmussen 2007<sup>2</sup>: beta-blockers, Rasmussen 2007<sup>3</sup>: calcium channel blockers.

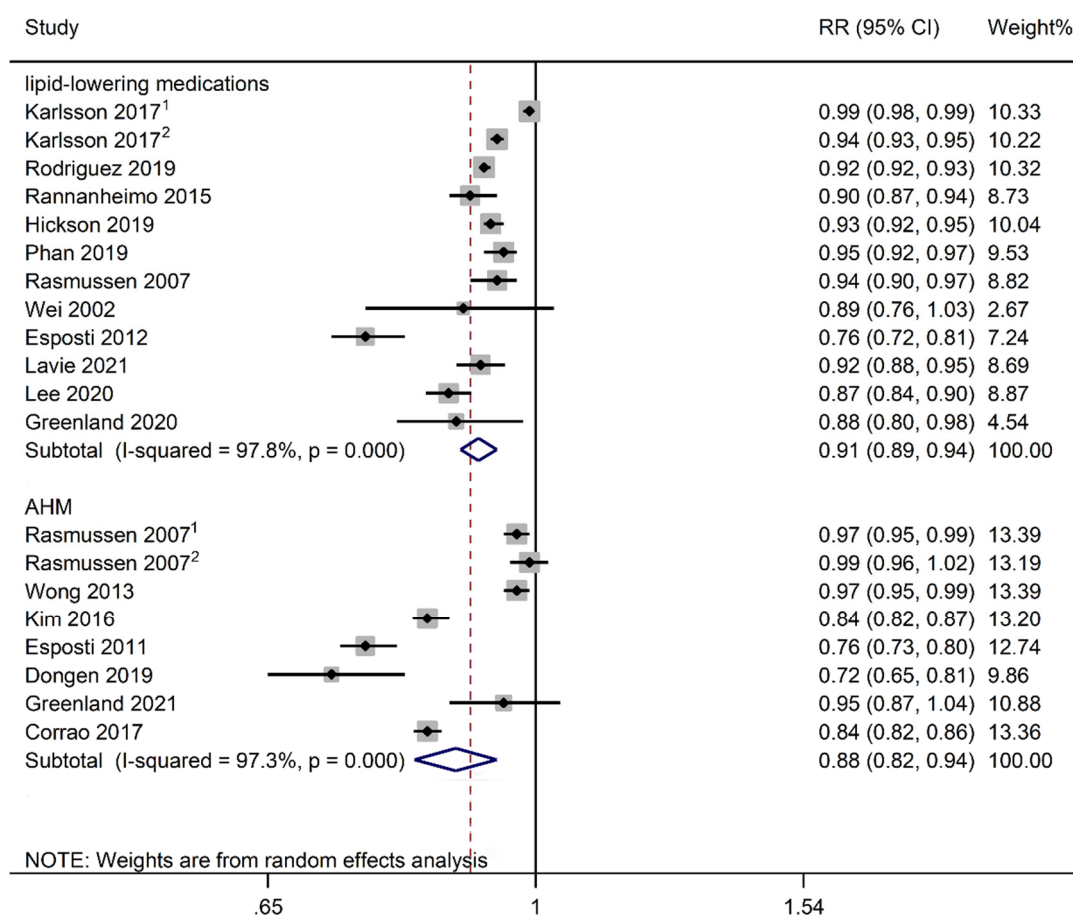

**Figure S10** Forest plot of study-specific relative risk statistics for all-cause mortality per 20% increment of antihypertensive medication adherence (AHM) and lipid-lowering medications adherence.

Rasmussen 2007<sup>1</sup>: beta-blockers, Rasmussen 2007<sup>2</sup>: calcium channel blockers; Karlsson 2017<sup>1</sup>: primary prevention; Karlsson 2017<sup>2</sup>: secondary prevention.

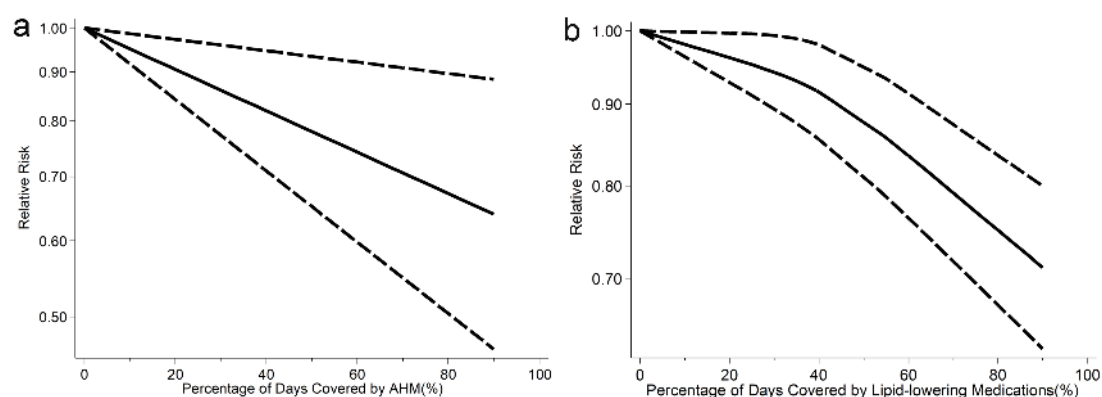

**Figure S11 (a)** Pooled dose-response analysis of antihypertensive medication adherence and all-cause mortality risk (solid line). **(b)** Pooled dose-response analysis of lipid-lowering medication adherence and all-cause mortality risk (solid line). Dashed lines represent the 95% CI.

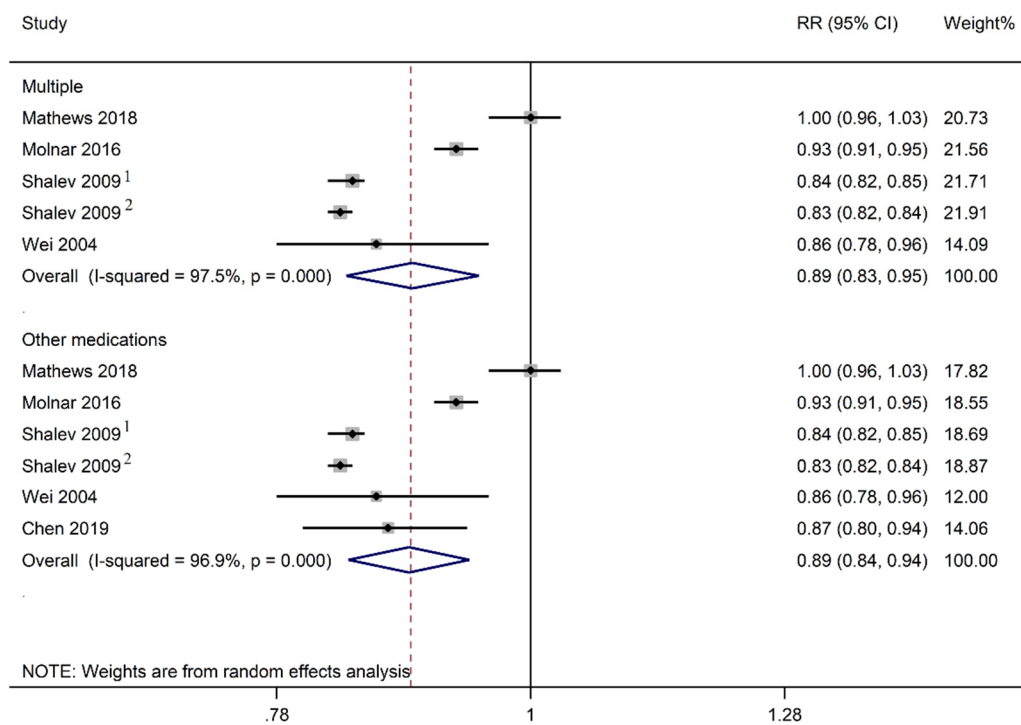

**Figure S12** Forest plot of study-specific relative risk statistics for total cardiovascular diseases per 20% increment of multiple medication and other medication (multiple and antithrombotic) adherence. Shalev 2009<sup>1</sup>: primary prevention, Shalev 2009<sup>2</sup>: secondary prevention

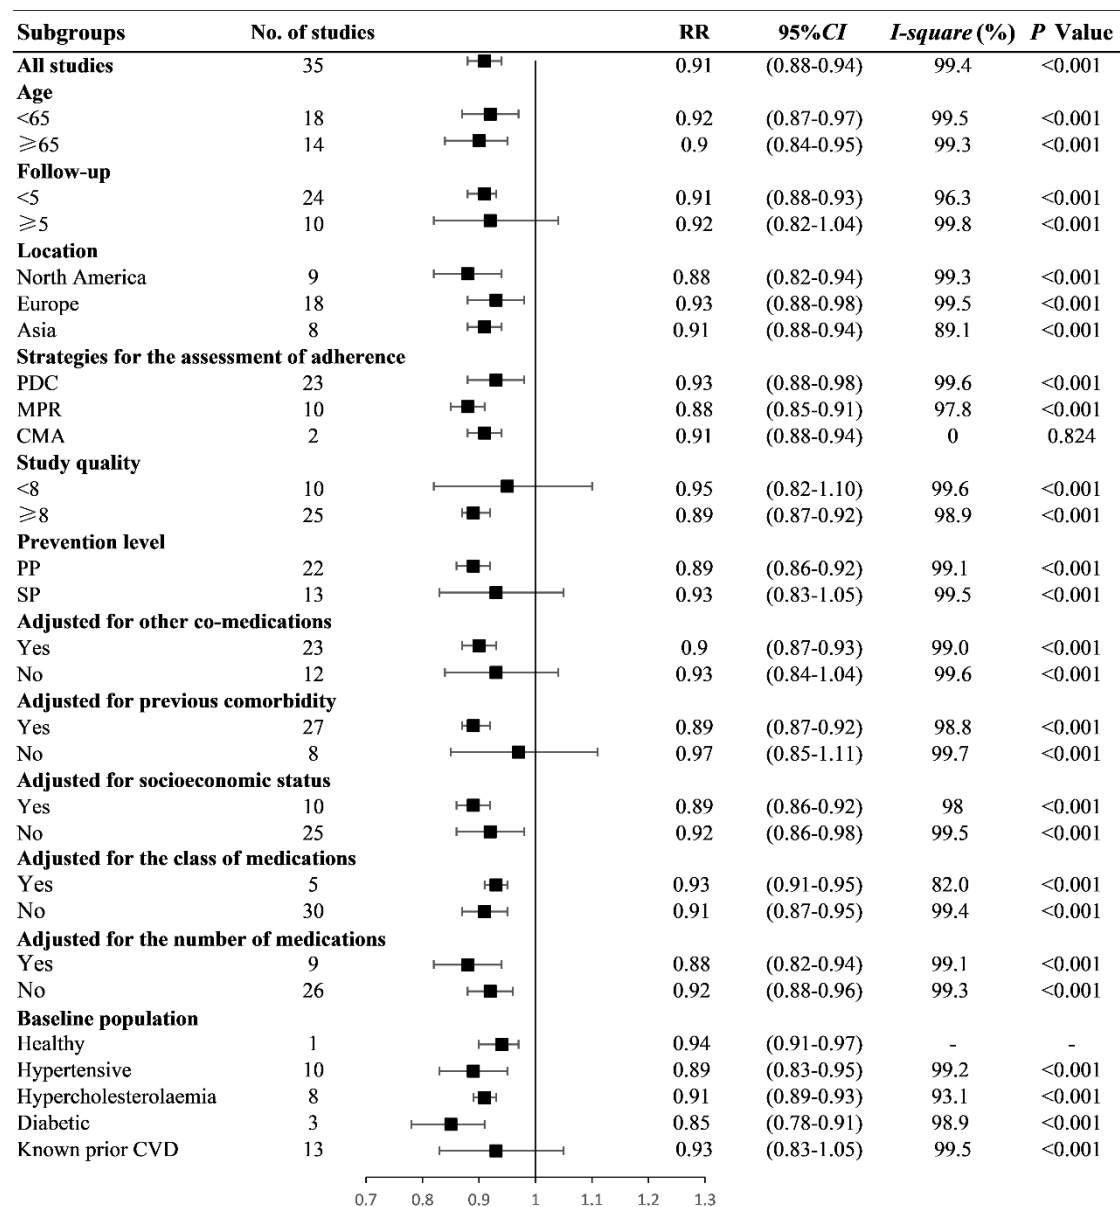

**Figure S13** Subgroup analysis of dose response relation of risk of total cardiovascular diseases with cardiovascular medication adherence.

RR: relative risk; CI: confidence interval; PDC: proportion of days covered; MPR: medication possession ratio; CMA: cumulative medication adherence. PP: primary prevention, SP: secondary prevention. CVD: cardiovascular disease. *P* for heterogeneity within each subgroup estimated by the Cochran *Q* test.

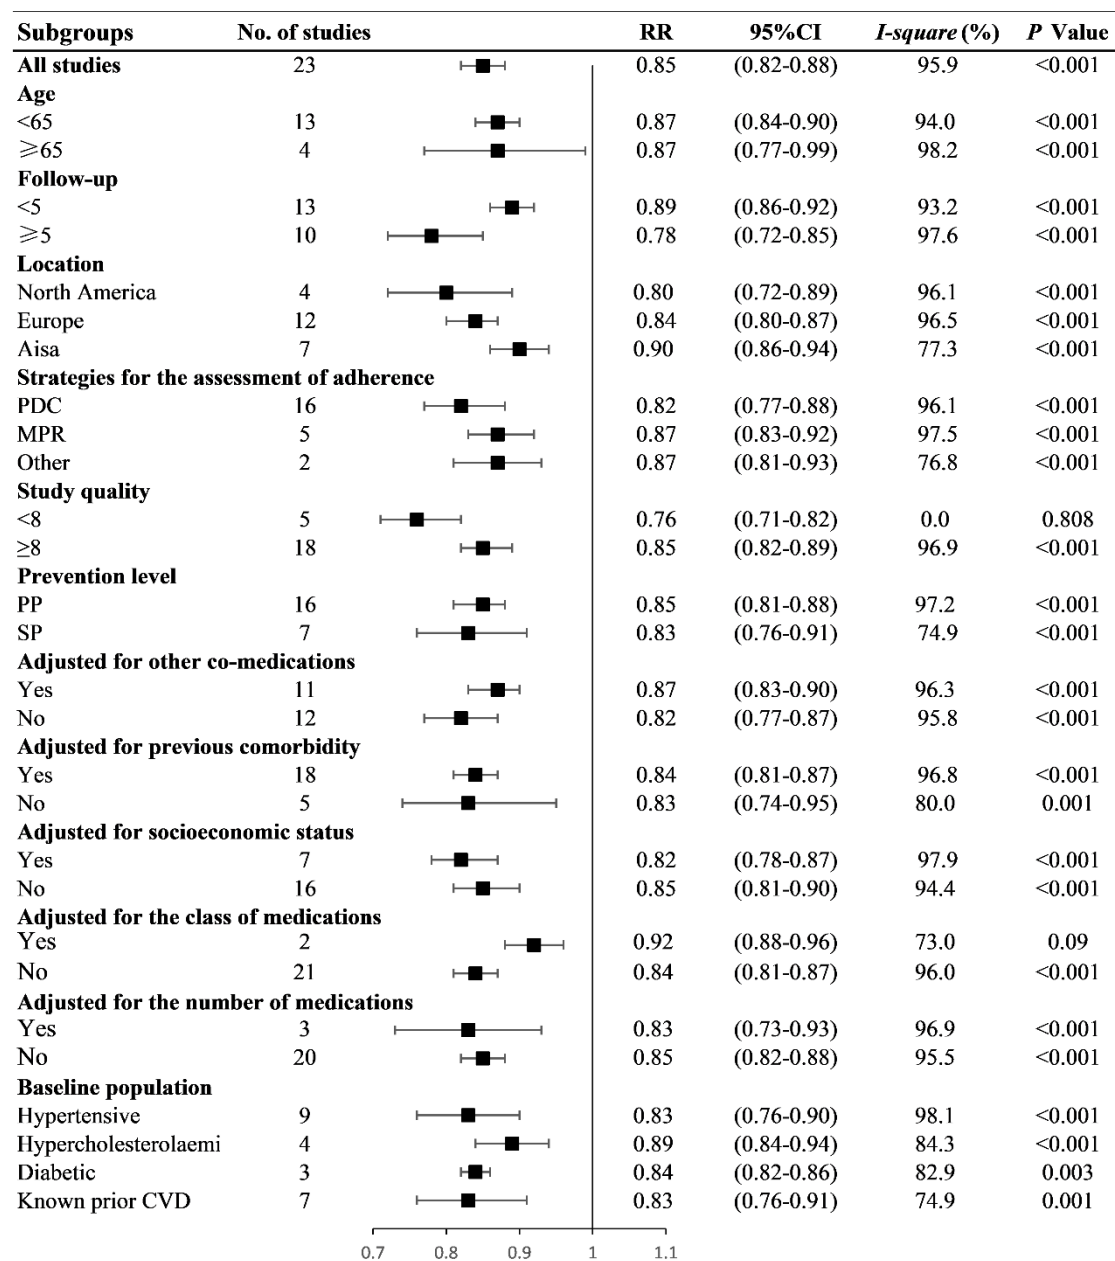

**Figure S14** Subgroup analysis of dose response relation of risk of stroke with cardiovascular medication adherence.

RR: relative risk; CI: confidence interval; PDC: proportion of days covered; MPR: medication possession ratio; PMC: proportion of months covered; CMA: cumulative medication adherence. PP: primary prevention, SP: secondary prevention. CVD: cardiovascular disease. *P* for heterogeneity within each subgroup estimated by the Cochran *Q* test.

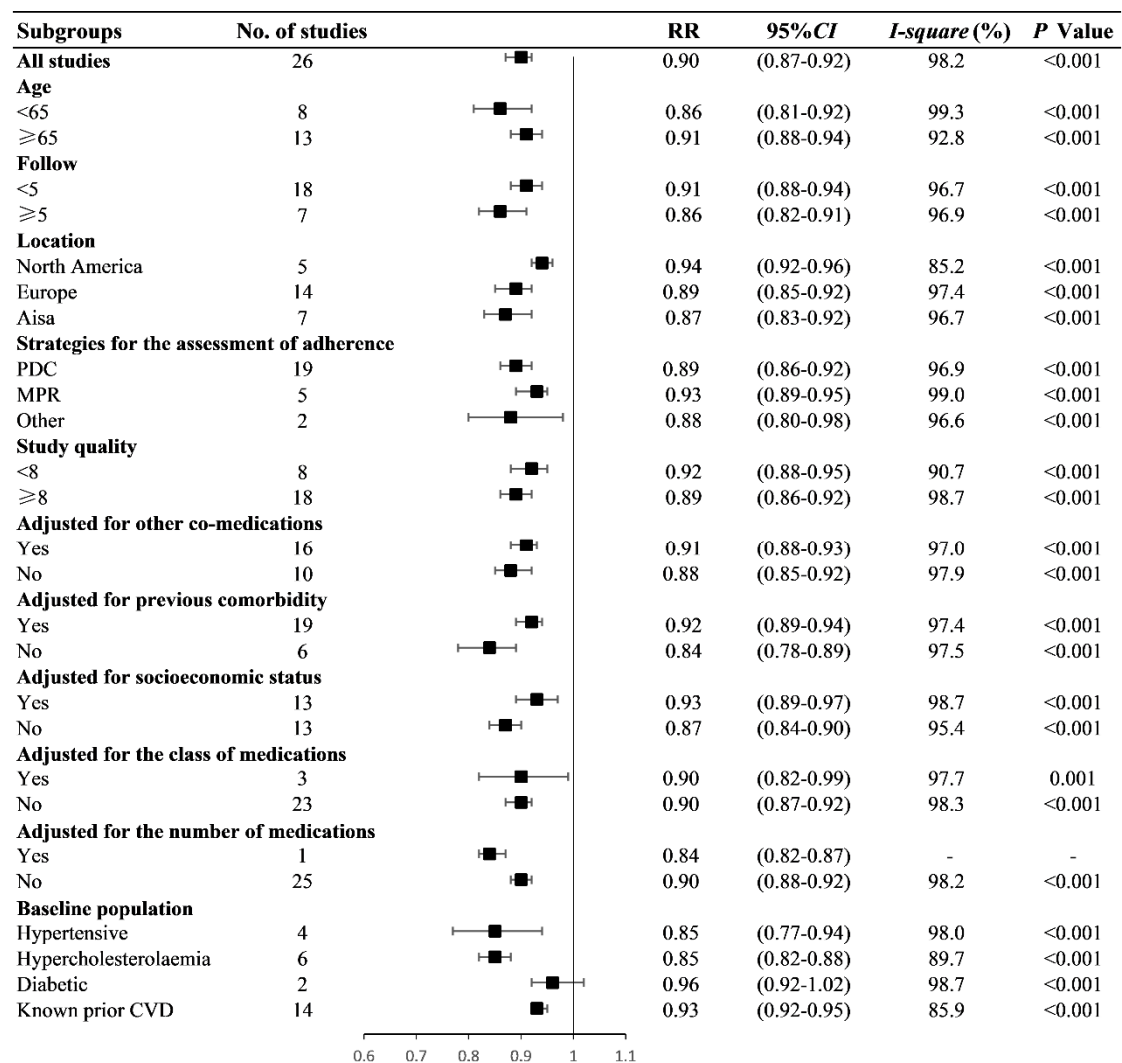

**Figure S15** Subgroup analysis of dose response relation of risk of all-cause mortality with cardiovascular medication adherence.

RR: relative risk; CI: confidence interval; PDC: proportion of days covered; MPR: medication possession ratio; PMC: proportion of months covered; CMA: cumulative medication adherence. CVD: cardiovascular disease. *P* for heterogeneity within each subgroup estimated by the Cochran *Q* test.



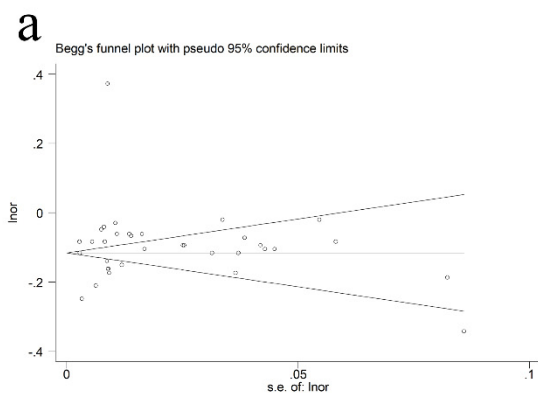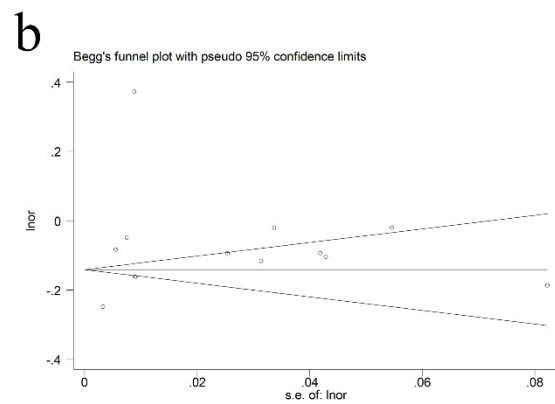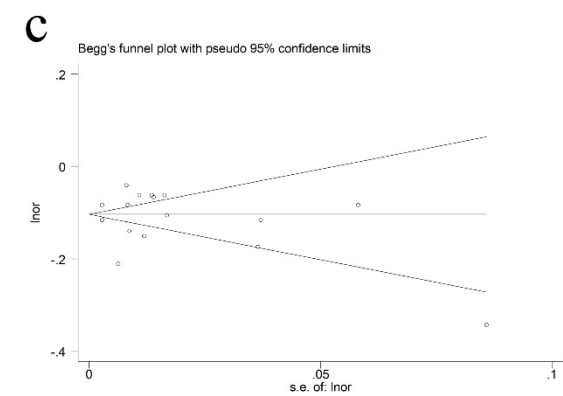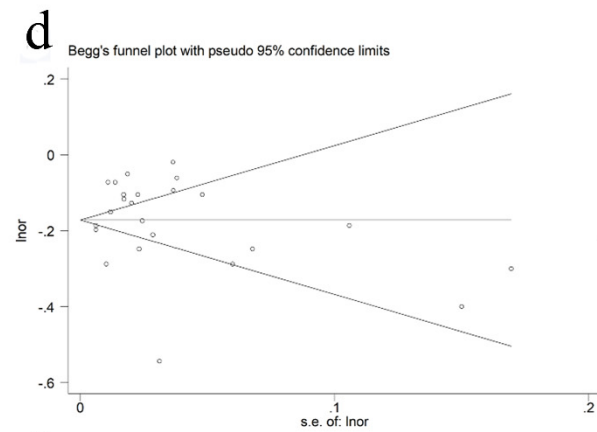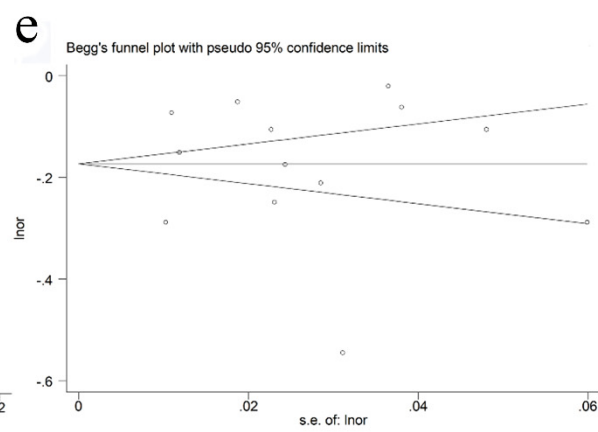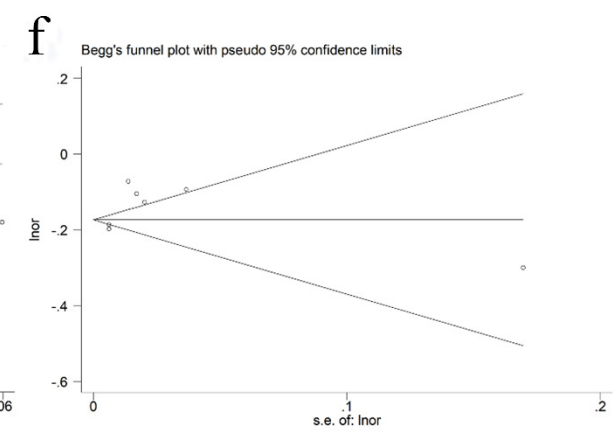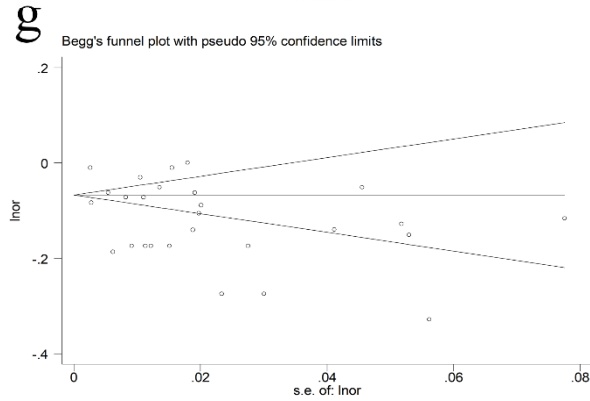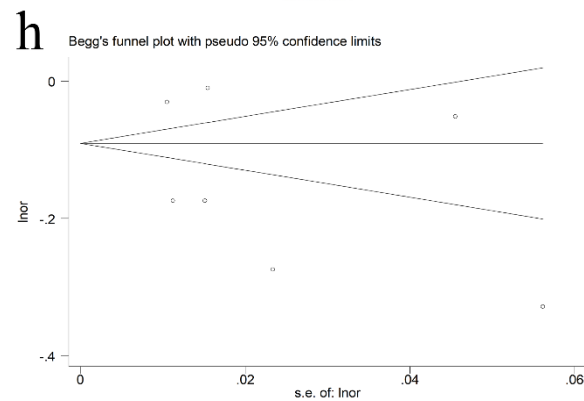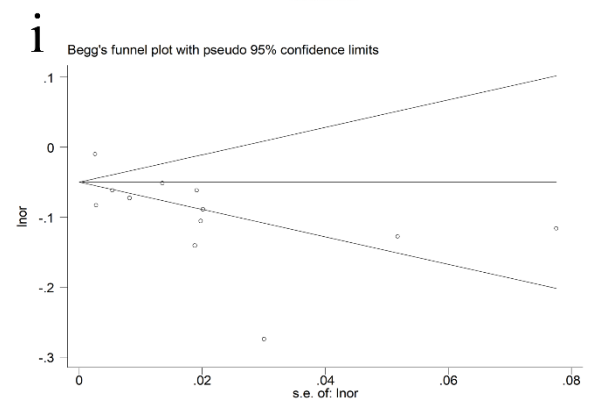

**Figure S16** (a) Publication bias test for the association between cardiovascular medications adherence and total cardiovascular diseases risk. (b) Publication bias test for the association between antihypertensive medications adherence and total cardiovascular diseases risk. (c) Publication bias test for the association between lipid-lowering medications adherence and total cardiovascular diseases risk. (d) Publication bias test for the association between cardiovascular medications adherence and stroke risk. (e) Publication bias test for the association between antihypertensive medications adherence and stroke risk. (f) Publication bias test for the association between lipid-lowering medications adherence and stroke risk. (g) Publication bias test for the association between cardiovascular medications adherence and all-cause mortality risk. (h) Publication bias test for the association between antihypertensive medications adherence and all-cause mortality risk. (i) Publication bias test for the association between lipid-lowering medications adherence and all-cause mortality risk. Begg's test,  $p > |z| = 0.005$  (continuity corrected)

## S1. Search strategy

PubMed database:

|    |                                                                                                                                                                                                                                                                                                                                                                  |
|----|------------------------------------------------------------------------------------------------------------------------------------------------------------------------------------------------------------------------------------------------------------------------------------------------------------------------------------------------------------------|
| #1 | "medication adherence" [MeSH Terms] OR "medication compliance" [MeSH Terms] OR "medication persistence" [MeSH Terms] OR "medication adherence" [All Fields] OR "medication compliance" [All Fields] OR "medication persistence"[All Fields] OR "adherence"[All Fields] OR "persistence"[All Fields]                                                              |
| #2 | "antihypertensive agents"[MeSH Terms] OR "hydroxymethylglutaryl-coa reductase inhibitors"[MeSH Terms] OR "aspirin"[MeSH Terms] OR "clopidogrel"[MeSH Terms] OR "adrenergic beta-antagonists"[MeSH Terms] OR "hypoglycemic agents"[MeSH Terms]                                                                                                                    |
| #3 | "Cardiovascular Diseases" [MeSH Terms] OR "Coronary Artery Disease" [MeSH Terms] OR "Atherosclerosis" [MeSH Terms] OR "Coronary Disease" [MeSH Terms] OR "Myocardial Infarction" [MeSH Terms] OR "Myocardial Ischemia" [MeSH Terms] OR "Stroke" [MeSH Terms] OR "Cerebrovascular" [All Fields] OR "Mortality" [MeSH Terms] OR "All cause mortality" [All Fields] |
| #4 | #1 AND #2 AND #3                                                                                                                                                                                                                                                                                                                                                 |

Web of Science database:

|     |                                                                                                                                                                              |
|-----|------------------------------------------------------------------------------------------------------------------------------------------------------------------------------|
| #1  | TI= (medication adherence OR medication compliance OR medication persistence)                                                                                                |
| #2  | TS= (medication adherence OR medication compliance OR medication persistence OR adherence OR persistence)                                                                    |
| #3  | #1 OR #2                                                                                                                                                                     |
| #4  | TI= (antihypertensive agents OR hydroxymethylglutaryl-coa reductase inhibitors OR aspirin OR clopidogrel OR adrenergic beta-antagonists OR hypoglycemic agents)              |
| #5  | TI= (Cardiovascular Diseases OR Coronary Artery Disease OR Atherosclerosis OR Coronary Disease OR Myocardial Infarction OR Myocardial Ischemia OR Stroke OR Cerebrovascular) |
| #7  | TI= (Mortality)                                                                                                                                                              |
| #8  | TS= (All-cause mortality)                                                                                                                                                    |
| #9  | #6 OR #7 OR #8                                                                                                                                                               |
| #10 | #3 AND #4 AND #9                                                                                                                                                             |

EMBASE database:

((('medication adherence'/exp OR 'medication adherence':ab,ti) OR ('medication compliance'/exp OR 'medication compliance':ab,ti) OR 'medication persistence':ab,ti OR ('adherence'/exp OR adherence:ab,ti) OR ('persistence'/exp OR persistence:ab,ti)) AND (('antihypertensive agent'/exp OR 'antihypertensive agent':ab,ti) OR ('hydroxymethylglutaryl-coa reductase inhibitors'/exp OR 'hydroxymethylglutaryl-coa reductase inhibitors':ab,ti) OR ('aspirin'/exp OR aspirin:ab,ti) OR ('clopidogrel'/exp OR 'clopidogrel':ab,ti) OR ('adrenergic beta-antagonists'/exp OR 'adrenergic beta-antagonists':ab,ti) OR ('antidiabetic agent'/exp OR 'antidiabetic agent':ab,ti)) AND (((('cardiovascular diseases'/exp OR 'cardiovascular diseases':ab,ti) OR ('coronary artery disease'/exp OR 'coronary artery disease':ab,ti) OR ('atherosclerosis'/exp OR atherosclerosis:ab,ti) OR ('coronary disease'/exp OR 'coronary disease':ab,ti) OR ('myocardial infarction'/exp OR 'myocardial infarction':ab,ti) OR ('myocardial ischemia'/exp OR 'myocardial ischemia':ab,ti) OR ('stroke'/exp OR stroke:ab,ti) OR ('cerebrovascular disease'/exp OR 'cerebrovascular disease':ab,ti)) OR (('mortality'/exp OR 'mortality':ab,ti) OR ('all cause mortality'/exp OR 'all cause mortality':ab,ti))))

Cohrance database:

|     |                                                                                                                          |        |
|-----|--------------------------------------------------------------------------------------------------------------------------|--------|
| #1  | MeSH descriptor:[Medication Adherence] explode all trees                                                                 | MeSH   |
| #2  | (medication adherence):ti,ab,kw                                                                                          | Limits |
| #3  | (medication compliance):ti,ab,kw OR (medication persistence):ti,ab,kw OR (persistence):ti,ab,kw OR (compliance):ti,ab,kw | Limits |
| #4  | #1 OR #2 OR #3                                                                                                           |        |
| #5  | MeSH descriptor:[Antihypertensive Agent] explode all trees                                                               | MeSH   |
| #6  | MeSH descriptor:[Hydroxymethylglutaryl-CoA Reductase Inhibitors] explode all trees                                       | MeSH   |
| #7  | MeSH descriptor:[Aspirin] explode all trees                                                                              | MeSH   |
| #8  | MeSH descriptor:[Clopidogrel] explode all trees                                                                          | MeSH   |
| #9  | MeSH descriptor:[ Adrenergic beta-Antagonists] explode all trees                                                         | MeSH   |
| #10 | MeSH descriptor:[ Hypoglycemic- Agent] explode all trees                                                                 | MeSH   |

|     |                                                                    |        |
|-----|--------------------------------------------------------------------|--------|
| #11 | #5 OR #6 OR #7 OR #8 OR #9 OR #10                                  | Limits |
| #12 | MeSH descriptor:[Cardiovascular Diseases] explode all trees        | MeSH   |
| #13 | MeSH descriptor:[Coronary Artery Disease] explode all trees        | MeSH   |
| #14 | MeSH descriptor:[Atherosclerosis] explode all trees                | MeSH   |
| #15 | MeSH descriptor:[Coronary disease] explode all trees               | MeSH   |
| #16 | MeSH descriptor:[Myocardial Infarction] explode all trees          | MeSH   |
| #17 | MeSH descriptor:[Myocardial Ischemia] explode all trees            | MeSH   |
| #18 | MeSH descriptor:[Stroke] explode all trees                         | MeSH   |
| #19 | MeSH descriptor:[Cerebrovascular Disease] explode all trees        | MeSH   |
| #20 | MeSH descriptor:[Mortality] explode all trees                      | MeSH   |
| #21 | (all cause mortality):ti,ab,kw                                     | MeSH   |
| #22 | #12 OR #13 OR #14 OR #15 OR #16 OR #17 OR #18 OR #19 OR #20 OR #21 | Limits |
| #23 | #4 AND #11 AND #22                                                 | Limits |

## S2. Reference list for the studies included

1. Korhonen MJ, Ruokoniemi P, Ilomäki J, Meretoja A, Helin-Salmivaara A, Huupponen R. Adherence to statin therapy and the incidence of ischemic stroke in patients with diabetes. *Pharmacoepidemiol Drug Saf.* 2016 Feb;25(2):161-9.
2. Bansilal S, Castellano JM, Garrido E, Wei HG, Freeman A, Spettell C, et al. Assessing the Impact of Medication Adherence on Long-Term Cardiovascular Outcomes. *Journal of the American College of Cardiology.* 2016;68(8):789-801.
3. Karlsson SA, Hero C, Svensson AM, Franzén S, Miftaraj M, Gudbjörnsdóttir S, et al. Association between refill adherence to lipid-lowering medications and the risk of cardiovascular disease and mortality in Swedish patients with type 2 diabetes mellitus: A nationwide cohort study. *BMJ Open.* 2018;8(3).
4. Rodriguez F, Maron DJ, Knowles JW, Virani SS, Lin S, Heidenreich PA. Association of Statin Adherence With Mortality in Patients With Atherosclerotic Cardiovascular Disease. *JAMA Cardiol.* 2019 Mar 1;4(3):206-13.
5. Kim J, Lee HS, Nam CM, Heo JH. Effects of Statin Intensity and Adherence on the Long-Term Prognosis After Acute Ischemic Stroke. *Stroke.* 2017 Oct;48(10):2723-30.
6. Corrao G, Monzio Compagnoni M, Franchi M, Cantarutti A, Pagni P, Merlino L, et al. Good adherence to therapy with statins reduces the risk of adverse clinical outcomes even among very elderly. Evidence from an Italian real-life investigation. *Eur J Intern Med.* 2017 Jan;47:25-31.
7. Mathews R, Wang W, Kaltenbach LA, Thomas L, Shah RU, Ali M, et al. Hospital Variation in Adherence Rates to Secondary Prevention Medications and the Implications on Quality. *Circulation.* 2018 May 15;137(20):2128-38.
8. Yeo SH, Toh MP, Lee SH, Seet RCS, Wong LY, Yau WP. Impact of medication nonadherence on stroke recurrence and mortality in patients after first-ever ischemic stroke: Insights from registry data in Singapore. *Pharmacoepidemiology and Drug Safety.* 2020.
9. Rannanheimo PK, Tiittanen P, Hartikainen J, Helin-Salmivaara A, Huupponen R, Vahtera J, et al. Impact of Statin Adherence on Cardiovascular Morbidity and All-Cause Mortality in the Primary Prevention of Cardiovascular Disease: A Population-Based Cohort Study in Finland. *Value in health : the journal of the International Society for Pharmacoeconomics and Outcomes Research.* 2015 Sep;18(6):896-905.
10. Hickson RP, Robinson JG, Annis IE, Killea-Jones LA, Fang G. It's not too late to improve statin adherence: Association between changes in Statin adherence from before to after acute myocardial infarction and all-cause mortality. *Journal of the American Heart Association.* 2019;8(7).
11. Chen SH, Lee HC, Chang KC, Hung JW, Chen HM, Wu CY, et al. Low persistence of antithrombotic agents is associated with poor outcomes after first-ever acute ischemic stroke. *Acta Neurologica Taiwanica.* 2019;28(4):95-118.
12. Ye X, Qian C, Liu J, St. Peter WL. Lower risk of major cardiovascular events associated with adherence to colesevelam HCl. *Pharmacotherapy.* 2013;33(10):1062-70.
13. Molnar MZ, Gosmanova EO, Sumida K, Potukuchi PK, Lu JL, Jing J, et al. Predialysis Cardiovascular Disease Medication Adherence and Mortality After Transition to Dialysis. *American Journal of Kidney Diseases.* 2016;68(4):609-18.
14. Chen PS, Cheng CL, Yang YHK, Li YH. Statin adherence after ischemic stroke or transient ischemic

attack is associated with clinical outcome. *Circulation Journal*. 2016;80(3):731-7.

15. Phan DQ, Duan L, Lam B, Hekimian A, Wee D, Zadeagan R, et al. Statin Adherence and Mortality in Patients Aged 80 Years and Older After Acute Myocardial Infarction. *Journal of the American Geriatrics Society*. 2019;67(10):2045-9.

16. Shalev V, Goldshtein I, Porath A, Weitzman D, Shemer J, Chodick G. Continuation of statin therapy and primary prevention of nonfatal cardiovascular events. *The American journal of cardiology*. 2012 Dec 15;110(12):1779-86.

17. Pittman DG, Chen W, Bowlin SJ, Foody JM. Adherence to statins, subsequent healthcare costs, and cardiovascular hospitalizations. *The American journal of cardiology*. 2011 Jun 1;107(11):1662-6.

18. Shalev V, Chodick G, Silber H, Kokia E, Jan J, Heymann AD. Continuation of statin treatment and all-cause mortality: a population-based cohort study. *Archives of internal medicine*. 2009 Feb 9;169(3):260-8.

19. Perreault S, Dragomir A, Blais L, Bérard A, Lalonde L, White M, et al. Impact of better adherence to statin agents in the primary prevention of coronary artery disease. *European journal of clinical pharmacology*. 2009 Oct;65(10):1013-24.

20. Corrao G, Scotti L, Zambon A, Baio G, Nicotra F, Conti V, et al. Cost-effectiveness of enhancing adherence to therapy with statins in the setting of primary cardiovascular prevention. Evidence from an empirical approach based on administrative databases. *Atherosclerosis*. 2011 Aug;217(2):479-85.

21. Rasmussen JN, Chong A, Alter DA. Relationship between adherence to evidence-based pharmacotherapy and long-term mortality after acute myocardial infarction. *Jama*. 2007 Jan 10;297(2):177-86.

22. Wei L, Flynn R, Murray GD, MacDonald TM. Use and adherence to beta-blockers for secondary prevention of myocardial infarction: who is not getting the treatment? *Pharmacoepidemiology and drug safety*. 2004 Nov;13(11):761-6.

23. Wei L, Wang J, Thompson P, Wong S, Struthers AD, MacDonald TM. Adherence to statin treatment and readmission of patients after myocardial infarction: a six year follow up study. *Heart (British Cardiac Society)*. 2002 Sep;88(3):229-33.

24. Degli Esposti L, Saragoni S, Batacchi P, Benemei S, Geppetti P, Sturani A, et al. Adherence to statin treatment and health outcomes in an Italian cohort of newly treated patients: results from an administrative database analysis. *Clinical therapeutics*. 2012 Jan;34(1):190-9.

25. Perreault S, Ellia L, Dragomir A, Côté R, Blais L, Bérard A, et al. Effect of statin adherence on cerebrovascular disease in primary prevention. *The American journal of medicine*. 2009 Jul;122(7):647-55.

26. Mazzaglia G, Ambrosioni E, Alacqua M, Filippi A, Sessa E, Immordino V, et al. Adherence to antihypertensive medications and cardiovascular morbidity among newly diagnosed hypertensive patients. *Circulation*. 2009 Oct 20;120(16):1598-605.

27. Herttua K, Tabak AG, Martikainen P, Vahtera J, Kivimäki M. Adherence to antihypertensive therapy prior to the first presentation of stroke in hypertensive adults: population-based study. *European heart journal*. 2013 Oct;34(38):2933-9.

28. Corrao G, Parodi A, Nicotra F, Zambon A, Merlino L, Cesana G, et al. Better compliance to antihypertensive medications reduces cardiovascular risk. *Journal of hypertension*. 2011 Mar;29(3):610-8.

29. Krousel-Wood M, Holt E, Joyce C, Ruiz R, Dornelles A, Webber LS, et al. Differences in cardiovascular disease risk when antihypertensive medication adherence is assessed by pharmacy fill versus self-report: the Cohort Study of Medication Adherence among Older Adults (CoSMO). *Journal of hypertension*. 2015 Feb;33(2):412-20.

30. Wong MC, Tam WW, Cheung CS, Wang HH, Tong EL, Sek AC, et al. Drug adherence and the incidence of coronary heart disease- and stroke-specific mortality among 218,047 patients newly prescribed an antihypertensive medication: a five-year cohort study. *International journal of cardiology*. 2013 Sep 30;168(2):928-33.

31. Kim S, Shin DW, Yun JM, Hwang Y, Park SK, Ko YJ, et al. Medication Adherence and the Risk of Cardiovascular Mortality and Hospitalization Among Patients With Newly Prescribed Antihypertensive Medications. *Hypertension (Dallas, Tex : 1979)*. 2016 Mar;67(3):506-12.

32. Herttua K, Martikainen P, Batty GD, Kivimäki M. Poor Adherence to Statin and Antihypertensive Therapies as Risk Factors for Fatal Stroke. *Journal of the American College of Cardiology*. 2016 Apr 5;67(13):1507-15.

33. Degli Esposti L, Saragoni S, Benemei S, Batacchi P, Geppetti P, Di Bari M, et al. Adherence to

- antihypertensive medications and health outcomes among newly treated hypertensive patients. *ClinicoEconomics and outcomes research* : CEOR. 2011;3:47-54.
34. Yang Z, Howard DH, Will J, Loustalot F, Ritchey M, Roy K. Association of Antihypertensive Medication Adherence With Healthcare Use and Medicaid Expenditures for Acute Cardiovascular Events. *Medical care*. 2016 May;54(5):504-11.
  35. Liu PH, Hu FC, Wang JD. Differential risks of stroke in pharmacotherapy on uncomplicated hypertensive patients? *Journal of hypertension*. 2009;27(1):174-80.
  36. Corrao G, Rea F, Ghirardi A, Soranna D, Merlino L, Mancina G. Adherence with antihypertensive drug therapy and the risk of heart failure in clinical practice. *Hypertension*. 2015;66(4):742-9.
  37. Yang Q, Chang A, Ritchey MD, Loustalot F. Antihypertensive Medication Adherence and Risk of Cardiovascular Disease Among Older Adults: A Population-Based Cohort Study. *Journal of the American Heart Association*. 2017 Jun 24;6(6).
  38. Kim HJ, Yoon SJ, Oh IH, Lim JH, Kim YA. Medication adherence and the occurrence of complications in patients with newly diagnosed hypertension. *Korean Circulation Journal*. 2016;46(3):384-93.
  39. Corrao G, Rea F, Monzio Compagnoni M, Merlino L, Mancina G. Protective effects of antihypertensive treatment in patients aged 85 years or older. *Journal of hypertension*. 2017 Jul;35(7):1432-41.
  40. van Dongen MME, Aarnio K, Martinez-Majander N, Pirinen J, Sinisalo J, Lehto M, et al. Use of antihypertensive medication after ischemic stroke in young adults and its association with long-term outcome. *Ann Med*. 2019 Feb;51(1):68-77.
  41. Lee HJ, Jang SI, Park EC. Effect of adherence to antihypertensive medication on stroke incidence in patients with hypertension: a population-based retrospective cohort study. *BMJ open*. 2017 Jul 2;7(6):e014486.
  42. Kim J, Bushnell CD, Lee HS, Han SW. Effect of adherence to antihypertensive medication on the long-term outcome after hemorrhagic stroke in Korea. *Hypertension (Dallas, Tex : 1979)*. 2018;72(2):391-8.
  43. Lavie G, Hoshen M, Leibowitz M, Benis A, Akriv A, Balicer R, et al. Statin Therapy for Primary Prevention in the Elderly and Its Association with New-Onset Diabetes, Cardiovascular Events, and All-Cause Mortality. *American Journal of Medicine*. 2021;134(5):643-52.
  44. Lee YR, Oh SS, Jang SI, Park EC. Statin adherence and risk of all-cause, cancer, and cardiovascular mortality among dyslipidemia patients: A time-dependent analysis. *Nutrition, metabolism, and cardiovascular diseases : NMCD*. 2020 Nov 27;30(12):2207-14.
  45. Greenland M, Knuiman MW, Hung J, Nedkoff L, Arnet I, Rankin JM, et al. Cardioprotective medication adherence in Western Australians in the first year after myocardial infarction: restricted cubic spline analysis of adherence-outcome relationships. *Scientific reports*. 2020;10(1):4315.
  46. Ahrens I, Khachatryan A, Monga B, Dornstaeder E, Sidelnikov E. Association of Treatment Intensity and Adherence to Lipid-Lowering Therapy with Major Adverse Cardiovascular Events Among Post-MI Patients in Germany. *BMJ open*. 2021 May;38(5):2532-41.
